# Supplementary material for: SPRITE: a genome-wide method for mapping higher-order 3D interactions in the nucleus using combinatorial split-and-pool barcoding
Source: Springer Nature journal article supplement (doi:10.1038/s41596-021-00633-y), 2022-01-01
Supplement: MOESM1 [file 41596_2021_633_MOESM1_ESM14.pdf]

---

## Supplementary information

---

# **SPRITE: a genome-wide method for mapping higher-order 3D interactions in the nucleus using combinatorial split-and-pool barcoding**

---

In the format provided by the  
authors and unedited

## SUPPLEMENTARY METHODS

### Cell culture and crosslinking for adherent cells

1. Seed and culture adherent cells on 15 cm plates under recommended conditions.  
We typically freeze 5-10 million cells per pellet in a 1.7 mL microcentrifuge tube.
2. Pre-chill one bottle ( $\geq 100$  mL) of 1 x PBS (without Magnesium and without Calcium) at 4 °C, keep one bottle ( $\geq 100$  mL) of 1 x PBS at room temperature. Store scraping buffer at 4 °C.
3. Aspirate media from plates.
4. Wash cells gently with 10 mL of room temperature 1x PBS.
5. Remove PBS.
6. Add 10 mL of 2 mM DSG crosslinking solution to a 15 cm plate.
7. Rock **gently** side-to-side at room temperature for 45 minutes.
8. Wash cells with 10 mL room temperature 1 x PBS.
9. Add 10 mL of freshly prepared 3% formaldehyde solution.  
✗ CRITICAL: We strongly recommend making a working solution of 3% formaldehyde **fresh** every time by opening a new ampule to minimize methanol conversion. Do not use an ampule opened more than ~30 min before crosslinking the cells.
10. Rock gently at room temperature for 10 minutes.
11. Add 2 mL of fresh 2.5 M glycine stop solution ✗.  
✗ CRITICAL: Ensure that the 2.5 M glycine stop solution was made within a month from its use.
12. Rock gently at room temperature for 5 minutes.
13. Discard formaldehyde supernatant in an appropriate waste container. From here, keep cells at 4 °C.
14. Carefully wash with 10 mL of cold 1x PBS, gently rocking plates for 1-2 minutes.
15. Repeat wash step two more times, discarding PBS in formaldehyde liquid waste.
16. After the last wash, add 7 mL of Scraping Buffer (ice cold 1x PBS + 0.5% (w/v) BSA) to each 15-cm plate.
17. Scrape cells from plate and transfer to a 15 mL falcon tube.
18. Centrifuge at 1000 x g at 4 °C for 5 min to pellet cells.
19. Discard supernatant and resuspend cells in 1 mL cold scraping buffer to break up the pellet. Add scraping buffer until cell concentration is ~10M cells per 1 mL.
20. Aliquot 10 million cells into microcentrifuge tubes and spin at 2000 x g for 5 min at 4 °C.
21. Remove supernatant and discard.
22. Flash freeze cell pellets in liquid nitrogen.  
**Pause Point:** Store pellets at -80 °C for up to 5 years.

## Legends

**Supplementary Methods:** An alternative approach to crosslinking in solution (described in the main procedure) is to perform crosslinking on adherent cells within a tissue culture plate. A detailed step-by-step protocol is included in the Supplementary Methods.
