# Supplementary material for: SPRITE: a genome-wide method for mapping higher-order 3D interactions in the nucleus using combinatorial split-and-pool barcoding
Source: Springer Nature journal article supplement (doi:10.1038/s41596-021-00633-y), 2022-01-01
Supplement: MOESM3 [file 41596_2021_633_MOESM3_ESM.xlsx]

## Sheet: SPRITE-NHScoupling-Calculation
Prerequisites to calculating amount of lysate to couple to NHS Beads
(0) Reverse Crosslink an aliquot of lysate and Zymo Clean & Concentrate DNA - write down (a) volume of lysate reverse crosslinked (uL), (b) elution volume of DNA post Zymo cleanup (uL)
(1) Measure average DNA size (bp) on either an Agilent High Sensitivity DNA Kit or Agilent High Sensitivity D1000/D5000 ScreenTape
(2) Measure DNA concentration using Qubit® dsDNA HS Assay Kit of Zymo Cleaned Lysate (post reverse crosslinking)
(3) Input volume of NHS Beads to couple (mL)
(4) Ratio of Beads:Molecules for NHS coupling
	Input values described in Prerequisite Steps 0-4 here										Volume to Couple
Sample	(0a) Volume of lysate reverse crosslinked (uL)	(0b) Elution Volume of DNA post Zymo Clean (uL)	(1) Average DNA Size (bp)	(2) DNA concentration (ng/uL)	(3) Volume of NHS beads to couple (mL)	(4) Ratio of Beads to Molecules for Coupling	DNA molarity (nM) in cleaned eluate	Molecules of DNA in cleaned eluate	Molecules DNA/uL Lysate	Number Molecules to Couple	uL Lysate to couple	NOTE: If volume to couple is <1uL, it is recommended to dilute the lysate 1:10 or 1:100 (as needed) to reduce pipetting error.
Sample 1	10	10	373	5.28	2	2	21.8112	1.31347e+11	1.31347e+10	9551000000	0.727156
YourSample
						^We recommend starting with a ratio between 1-2 Beads:Molecule (NOTE: between 1-8 Beads:Molecule has yielded successful SPRITE experiments)

## Sheet: SPRITE-PostLibrary-Molecule-Est
Prerequisites to estimating number of unique molecules post PCR
(0) PCR amplify SPRITE aliquot - write down number of cycles
(1) Ampure XP SPRI cleanup of PCR library - (a) write down number of SPRI cleanups, and (b) elution volume (uL)
(2) Measure DNA concentration of SPRI cleaned library (ng/uL) using Qubit® dsDNA HS Assay Kit
(3) Measure average DNA size (bp) on either an Agilent High Sensitivity DNA Kit or Agilent High Sensitivity D1000/D5000 ScreenTape
	Input values described in Prerequisite Steps #0-3 here								Recommended Sequencing Reads
Sample	(0) Number of PCR cycles	(1a) Number of SPRI cleanups	(1b) SPRI Elution volume (uL)	(2) DNA concentration of Library (ng/uL)	(3) Average size of library (bp)	Library molarity (nM)	Total DNA molecules Post-PCR	Estimated DNA molecules pre-PCR	1.50x Coverage (Million reads)	1.5x Coverage (Million reads)	2x Coverage (Million reads)
Library 1	13	2	12	0.532	435	1.88442	1.36176e+10	1.32984e+07	13.2984	19.9476	26.5968
YourLibrary
		(1a) We track number of SPRI cleanups to account for approximately 50% loss for every round of SPRI cleanup of a library
