# Supplementary material for: SPRITE: a genome-wide method for mapping higher-order 3D interactions in the nucleus using combinatorial split-and-pool barcoding
Source: Springer Nature journal article supplement (doi:10.1038/s41596-021-00633-y), 2022-01-01
Supplement: MOESM4 [file 41596_2021_633_MOESM4_ESM17.xlsx]

## Sheet: Sheet1
PlateName	Name/Identifier	Barcode	Entire Sequence
Terminal_Top_LigateOdd_Stagger	NYTop1_Stg		/5Phos/AGTTGTCACCATAATAAGATCGGAAGA
Terminal_Top_LigateOdd_Stagger	NYTop2_Stg		/5Phos/AGTTGTCAAGGTAGCTAAGATCGGAAGA
Terminal_Top_LigateOdd_Stagger	NYTop3_Stg		/5Phos/AGTTGTCATGAACAATAGATCGGAAGA
Terminal_Top_LigateOdd_Stagger	NYTop4_Stg		/5Phos/AGTTGTCATTCGGTGGAGATCGGAAGA
Terminal_Top_LigateOdd_Stagger	NYTop5_Stg		/5Phos/AGTTGTCACAACTGATGAGATCGGAAGA
Terminal_Top_LigateOdd_Stagger	NYTop6_Stg		/5Phos/AGTTGTCCTCTCAAGGAGATCGGAAGA
Terminal_Top_LigateOdd_Stagger	NYTop7_Stg		/5Phos/AGTTGTCACTTCCTGATAGATCGGAAGA
Terminal_Top_LigateOdd_Stagger	NYTop8_Stg		/5Phos/AGTTGTCGCTACTTCGAGATCGGAAGA
Terminal_Top_LigateOdd_Stagger	NYTop9_Stg		/5Phos/AGTTGTCAGTCGGTTAAAGATCGGAAGA
Terminal_Top_LigateOdd_Stagger	NYTop10_Stg		/5Phos/AGTTGTCATGTATGAACAGATCGGAAGA
Terminal_Top_LigateOdd_Stagger	NYTop11_Stg		/5Phos/AGTTGTCTTCTTCGTCAGATCGGAAGA
Terminal_Top_LigateOdd_Stagger	NYTop12_Stg		/5Phos/AGTTGTCCACAGAGGCAAGATCGGAAGA
Terminal_Top_LigateOdd_Stagger	NYTop13_Stg		/5Phos/AGTTGTCATCCATCTCAGATCGGAAGA
Terminal_Top_LigateOdd_Stagger	NYTop14_Stg		/5Phos/AGTTGTCCACTATGGTAGATCGGAAGA
Terminal_Top_LigateOdd_Stagger	NYTop15_Stg		/5Phos/AGTTGTCCCATTCGTACAGATCGGAAGA
Terminal_Top_LigateOdd_Stagger	NYTop16_Stg		/5Phos/AGTTGTCCGTCTCCTTAGATCGGAAGA
Terminal_Top_LigateOdd_Stagger	NYTop17_Stg		/5Phos/AGTTGTCGGTTAATGGAGATCGGAAGA
Terminal_Top_LigateOdd_Stagger	NYTop18_Stg		/5Phos/AGTTGTCCGTAAGGAGAAGATCGGAAGA
Terminal_Top_LigateOdd_Stagger	NYTop19_Stg		/5Phos/AGTTGTCTGGTGAGATAGATCGGAAGA
Terminal_Top_LigateOdd_Stagger	NYTop20_Stg		/5Phos/AGTTGTCCTTAGTTACGAGATCGGAAGA
Terminal_Top_LigateOdd_Stagger	NYTop21_Stg		/5Phos/AGTTGTCGAGCCAGTCTAGATCGGAAGA
Terminal_Top_LigateOdd_Stagger	NYTop22_Stg		/5Phos/AGTTGTCGAGTGGTATTAGATCGGAAGA
Terminal_Top_LigateOdd_Stagger	NYTop23_Stg		/5Phos/AGTTGTCATAATGCAGAGATCGGAAGA
Terminal_Top_LigateOdd_Stagger	NYTop24_Stg		/5Phos/AGTTGTCCAGCTACAAAGATCGGAAGA
Terminal_Top_LigateOdd_Stagger	NYTop25_Stg		/5Phos/AGTTGTCGATAACGGCAGATCGGAAGA
Terminal_Top_LigateOdd_Stagger	NYTop26_Stg		/5Phos/AGTTGTCGGTTGTATTCAGATCGGAAGA
Terminal_Top_LigateOdd_Stagger	NYTop27_Stg		/5Phos/AGTTGTCGTATTCTCCTAGATCGGAAGA
Terminal_Top_LigateOdd_Stagger	NYTop28_Stg		/5Phos/AGTTGTCGTCTTAGATGAGATCGGAAGA
Terminal_Top_LigateOdd_Stagger	NYTop29_Stg		/5Phos/AGTTGTCTTGTATTGAAGATCGGAAGA
Terminal_Top_LigateOdd_Stagger	NYTop30_Stg		/5Phos/AGTTGTCTAACTTATCGAGATCGGAAGA
Terminal_Top_LigateOdd_Stagger	NYTop31_Stg		/5Phos/AGTTGTCACTTGTCAAAGATCGGAAGA
Terminal_Top_LigateOdd_Stagger	NYTop32_Stg		/5Phos/AGTTGTCTAGAACTACAAGATCGGAAGA
Terminal_Top_LigateOdd_Stagger	NYTop33_Stg		/5Phos/AGTTGTCAGGATAGGCAGATCGGAAGA
Terminal_Top_LigateOdd_Stagger	NYTop34_Stg		/5Phos/AGTTGTCTATTGCCGCCAGATCGGAAGA
Terminal_Top_LigateOdd_Stagger	NYTop35_Stg		/5Phos/AGTTGTCTTGGCCGTAAAGATCGGAAGA
Terminal_Top_LigateOdd_Stagger	NYTop36_Stg		/5Phos/AGTTGTCTGAGGATTCCAGATCGGAAGA
Terminal_Top_LigateOdd_Stagger	NYTop37_Stg		/5Phos/AGTTGTCTTAACATGAGAGATCGGAAGA
Terminal_Top_LigateOdd_Stagger	NYTop38_Stg		/5Phos/AGTTGTCTAATCAATCAGATCGGAAGA
Terminal_Top_LigateOdd_Stagger	NYTop39_Stg		/5Phos/AGTTGTCTCAGTATATAGATCGGAAGA
Terminal_Top_LigateOdd_Stagger	NYTop40_Stg		/5Phos/AGTTGTCGAAGGAGCGAGATCGGAAGA
Terminal_Top_LigateOdd_Stagger	NYTop41_Stg		/5Phos/AGTTGTCATCGCGTACTAGATCGGAAGA
Terminal_Top_LigateOdd_Stagger	NYTop42_Stg		/5Phos/AGTTGTCCAGATCCGTGAGATCGGAAGA
Terminal_Top_LigateOdd_Stagger	NYTop43_Stg		/5Phos/AGTTGTCGATACCAGGAAGATCGGAAGA
Terminal_Top_LigateOdd_Stagger	NYTop44_Stg		/5Phos/AGTTGTCCGAAGACCTAGATCGGAAGA
Terminal_Top_LigateOdd_Stagger	NYTop45_Stg		/5Phos/AGTTGTCGGCCTTGGAAAGATCGGAAGA
Terminal_Top_LigateOdd_Stagger	NYTop46_Stg		/5Phos/AGTTGTCGGATGCTACAGATCGGAAGA
Terminal_Top_LigateOdd_Stagger	NYTop47_Stg		/5Phos/AGTTGTCGGCCGTAGGAGATCGGAAGA
Terminal_Top_LigateOdd_Stagger	NYTop48_Stg		/5Phos/AGTTGTCTCAAGCGTAAGATCGGAAGA
Terminal_Top_LigateOdd_Stagger	NYTop49_Stg		/5Phos/AGTTGTCATGGTCGCCAAGAGATCGGAAGA
Terminal_Top_LigateOdd_Stagger	NYTop50_Stg		/5Phos/AGTTGTCTGCCGGTTTAAGAGATCGGAAGA
Terminal_Top_LigateOdd_Stagger	NYTop51_Stg		/5Phos/AGTTGTCGCAACAACAGAGAGATCGGAAGA
Terminal_Top_LigateOdd_Stagger	NYTop52_Stg		/5Phos/AGTTGTCCAAACAACAGAGAGATCGGAAGA
Terminal_Top_LigateOdd_Stagger	NYTop53_Stg		/5Phos/AGTTGTCATATGTGAAACGAGATCGGAAGA
Terminal_Top_LigateOdd_Stagger	NYTop54_Stg		/5Phos/AGTTGTCTGCTTAGAAGCGAGATCGGAAGA
Terminal_Top_LigateOdd_Stagger	NYTop55_Stg		/5Phos/AGTTGTCGCTAGCAGTCGGAGATCGGAAGA
Terminal_Top_LigateOdd_Stagger	NYTop56_Stg		/5Phos/AGTTGTCCATGACTGGATGAGATCGGAAGA
Terminal_Top_LigateOdd_Stagger	NYTop57_Stg		/5Phos/AGTTGTCACTTCGGAGCTGAGATCGGAAGA
Terminal_Top_LigateOdd_Stagger	NYTop58_Stg		/5Phos/AGTTGTCTTAACGTTGTTGAGATCGGAAGA
Terminal_Top_LigateOdd_Stagger	NYTop59_Stg		/5Phos/AGTTGTCGCTAGTCTAATGAGATCGGAAGA
Terminal_Top_LigateOdd_Stagger	NYTop60_Stg		/5Phos/AGTTGTCCGCAAGTGCTGGAGATCGGAAGA
Terminal_Top_LigateOdd_Stagger	NYTop61_Stg		/5Phos/AGTTGTCAACGTACATCACAGATCGGAAGA
Terminal_Top_LigateOdd_Stagger	NYTop62_Stg		/5Phos/AGTTGTCTGGGACGACTACAGATCGGAAGA
Terminal_Top_LigateOdd_Stagger	NYTop63_Stg		/5Phos/AGTTGTCGCGAGTTGGACCAGATCGGAAGA
Terminal_Top_LigateOdd_Stagger	NYTop64_Stg		/5Phos/AGTTGTCCTGTATGGCGCCAGATCGGAAGA
Terminal_Top_LigateOdd_Stagger	NYTop65_Stg		/5Phos/AGTTGTCAGGGTGCTCTCCAGATCGGAAGA
Terminal_Top_LigateOdd_Stagger	NYTop66_Stg		/5Phos/AGTTGTCTCATTGCAGAGCAGATCGGAAGA
Terminal_Top_LigateOdd_Stagger	NYTop67_Stg		/5Phos/AGTTGTCGGAAACGTTCGCAGATCGGAAGA
Terminal_Top_LigateOdd_Stagger	NYTop68_Stg		/5Phos/AGTTGTCCCGACTCGATGCAGATCGGAAGA
Terminal_Top_LigateOdd_Stagger	NYTop69_Stg		/5Phos/AGTTGTCATCTACGTCATCAGATCGGAAGA
Terminal_Top_LigateOdd_Stagger	NYTop70_Stg		/5Phos/AGTTGTCTATGTTCTGCTCAGATCGGAAGA
Terminal_Top_LigateOdd_Stagger	NYTop71_Stg		/5Phos/AGTTGTCGCACGGGGTGTCAGATCGGAAGA
Terminal_Top_LigateOdd_Stagger	NYTop72_Stg		/5Phos/AGTTGTCCGGTCGAACAACAGATCGGAAGA
Terminal_Top_LigateOdd_Stagger	NYTop73_Stg		/5Phos/AGTTGTCACACATATAAAAGATCGGAAGA
Terminal_Top_LigateOdd_Stagger	NYTop74_Stg		/5Phos/AGTTGTCTGTGATGTCAAAGATCGGAAGA
Terminal_Top_LigateOdd_Stagger	NYTop75_Stg		/5Phos/AGTTGTCGTGGGGGATAAAGATCGGAAGA
Terminal_Top_LigateOdd_Stagger	NYTop76_Stg		/5Phos/AGTTGTCCACTGGTCACAAGATCGGAAGA
Terminal_Top_LigateOdd_Stagger	NYTop77_Stg		/5Phos/AGTTGTCAGGAGCATCCAAGATCGGAAGA
Terminal_Top_LigateOdd_Stagger	NYTop78_Stg		/5Phos/AGTTGTCTTAATTACTCAAGATCGGAAGA
Terminal_Top_LigateOdd_Stagger	NYTop79_Stg		/5Phos/AGTTGTCCCAATATGAGAAGATCGGAAGA
Terminal_Top_LigateOdd_Stagger	NYTop80_Stg		/5Phos/AGTTGTCCATATGTTCGAAGATCGGAAGA
Terminal_Top_LigateOdd_Stagger	NYTop81_Stg		/5Phos/AGTTGTCATGTAGTATGAAGATCGGAAGA
Terminal_Top_LigateOdd_Stagger	NYTop82_Stg		/5Phos/AGTTGTCTGACGTCGATAAGATCGGAAGA
Terminal_Top_LigateOdd_Stagger	NYTop83_Stg		/5Phos/AGTTGTCGCCCTGGTCTAAGATCGGAAGA
Terminal_Top_LigateOdd_Stagger	NYTop84_Stg		/5Phos/AGTTGTCCATCCACATTAAGATCGGAAGA
Terminal_Top_LigateOdd_Stagger	NYTop85_Stg		/5Phos/AGTTGTCAACATACTAATAGATCGGAAGA
Terminal_Top_LigateOdd_Stagger	NYTop86_Stg		/5Phos/AGTTGTCTTGGATAGGATAGATCGGAAGA
Terminal_Top_LigateOdd_Stagger	NYTop87_Stg		/5Phos/AGTTGTCGGGCGTGTAATAGATCGGAAGA
Terminal_Top_LigateOdd_Stagger	NYTop88_Stg		/5Phos/AGTTGTCCTATTTCAACTAGATCGGAAGA
Terminal_Top_LigateOdd_Stagger	NYTop89_Stg		/5Phos/AGTTGTCACAAAGGGCCTAGATCGGAAGA
Terminal_Top_LigateOdd_Stagger	NYTop90_Stg		/5Phos/AGTTGTCTACGCTCATCTAGATCGGAAGA
Terminal_Top_LigateOdd_Stagger	NYTop91_Stg		/5Phos/AGTTGTCGGAAGAAGAGTAGATCGGAAGA
Terminal_Top_LigateOdd_Stagger	NYTop92_Stg		/5Phos/AGTTGTCCCAATAATGGTAGATCGGAAGA
Terminal_Top_LigateOdd_Stagger	NYTop93_Stg		/5Phos/AGTTGTCACTGAGTCTGTAGATCGGAAGA
Terminal_Top_LigateOdd_Stagger	NYTop94_Stg		/5Phos/AGTTGTCTACAGACAATTAGATCGGAAGA
Terminal_Top_LigateOdd_Stagger	NYTop95_Stg		/5Phos/AGTTGTCGGTGAGGCCTTAGATCGGAAGA
Terminal_Top_LigateOdd_Stagger	NYTop96_Stg		/5Phos/AGTTGTCCTCTGTTCGTTAGATCGGAAGA
Terminal_Bottom_LigateOdd_Stagger	NYBot1_Stg	TATTATGGT	CAGACGTGTGCTCTTCCGATCTTATTATGGT
Terminal_Bottom_LigateOdd_Stagger	NYBot2_Stg	TAGCTACCTT	CAGACGTGTGCTCTTCCGATCTTAGCTACCTT
Terminal_Bottom_LigateOdd_Stagger	NYBot3_Stg	ATTGTTCAT	CAGACGTGTGCTCTTCCGATCTATTGTTCAT
Terminal_Bottom_LigateOdd_Stagger	NYBot4_Stg	CCACCGAAT	CAGACGTGTGCTCTTCCGATCTCCACCGAAT
Terminal_Bottom_LigateOdd_Stagger	NYBot5_Stg	CATCAGTTGT	CAGACGTGTGCTCTTCCGATCTCATCAGTTGT
Terminal_Bottom_LigateOdd_Stagger	NYBot6_Stg	CCTTGAGAG	CAGACGTGTGCTCTTCCGATCTCCTTGAGAG
Terminal_Bottom_LigateOdd_Stagger	NYBot7_Stg	ATCAGGAAGT	CAGACGTGTGCTCTTCCGATCTATCAGGAAGT
Terminal_Bottom_LigateOdd_Stagger	NYBot8_Stg	CGAAGTAGC	CAGACGTGTGCTCTTCCGATCTCGAAGTAGC
Terminal_Bottom_LigateOdd_Stagger	NYBot9_Stg	TTAACCGACT	CAGACGTGTGCTCTTCCGATCTTTAACCGACT
Terminal_Bottom_LigateOdd_Stagger	NYBot10_Stg	GTTCATACAT	CAGACGTGTGCTCTTCCGATCTGTTCATACAT
Terminal_Bottom_LigateOdd_Stagger	NYBot11_Stg	GACGAAGAA	CAGACGTGTGCTCTTCCGATCTGACGAAGAA
Terminal_Bottom_LigateOdd_Stagger	NYBot12_Stg	TGCCTCTGTG	CAGACGTGTGCTCTTCCGATCTTGCCTCTGTG
Terminal_Bottom_LigateOdd_Stagger	NYBot13_Stg	GAGATGGAT	CAGACGTGTGCTCTTCCGATCTGAGATGGAT
Terminal_Bottom_LigateOdd_Stagger	NYBot14_Stg	ACCATAGTG	CAGACGTGTGCTCTTCCGATCTACCATAGTG
Terminal_Bottom_LigateOdd_Stagger	NYBot15_Stg	GTACGAATGG	CAGACGTGTGCTCTTCCGATCTGTACGAATGG
Terminal_Bottom_LigateOdd_Stagger	NYBot16_Stg	AAGGAGACG	CAGACGTGTGCTCTTCCGATCTAAGGAGACG
Terminal_Bottom_LigateOdd_Stagger	NYBot17_Stg	CCATTAACC	CAGACGTGTGCTCTTCCGATCTCCATTAACC
Terminal_Bottom_LigateOdd_Stagger	NYBot18_Stg	TCTCCTTACG	CAGACGTGTGCTCTTCCGATCTTCTCCTTACG
Terminal_Bottom_LigateOdd_Stagger	NYBot19_Stg	ATCTCACCA	CAGACGTGTGCTCTTCCGATCTATCTCACCA
Terminal_Bottom_LigateOdd_Stagger	NYBot20_Stg	CGTAACTAAG	CAGACGTGTGCTCTTCCGATCTCGTAACTAAG
Terminal_Bottom_LigateOdd_Stagger	NYBot21_Stg	AGACTGGCTC	CAGACGTGTGCTCTTCCGATCTAGACTGGCTC
Terminal_Bottom_LigateOdd_Stagger	NYBot22_Stg	AATACCACTC	CAGACGTGTGCTCTTCCGATCTAATACCACTC
Terminal_Bottom_LigateOdd_Stagger	NYBot23_Stg	CTGCATTAT	CAGACGTGTGCTCTTCCGATCTCTGCATTAT
Terminal_Bottom_LigateOdd_Stagger	NYBot24_Stg	TTGTAGCTG	CAGACGTGTGCTCTTCCGATCTTTGTAGCTG
Terminal_Bottom_LigateOdd_Stagger	NYBot25_Stg	GCCGTTATC	CAGACGTGTGCTCTTCCGATCTGCCGTTATC
Terminal_Bottom_LigateOdd_Stagger	NYBot26_Stg	GAATACAACC	CAGACGTGTGCTCTTCCGATCTGAATACAACC
Terminal_Bottom_LigateOdd_Stagger	NYBot27_Stg	AGGAGAATAC	CAGACGTGTGCTCTTCCGATCTAGGAGAATAC
Terminal_Bottom_LigateOdd_Stagger	NYBot28_Stg	CATCTAAGAC	CAGACGTGTGCTCTTCCGATCTCATCTAAGAC
Terminal_Bottom_LigateOdd_Stagger	NYBot29_Stg	TCAATACAA	CAGACGTGTGCTCTTCCGATCTTCAATACAA
Terminal_Bottom_LigateOdd_Stagger	NYBot30_Stg	CGATAAGTTA	CAGACGTGTGCTCTTCCGATCTCGATAAGTTA
Terminal_Bottom_LigateOdd_Stagger	NYBot31_Stg	TTGACAAGT	CAGACGTGTGCTCTTCCGATCTTTGACAAGT
Terminal_Bottom_LigateOdd_Stagger	NYBot32_Stg	TGTAGTTCTA	CAGACGTGTGCTCTTCCGATCTTGTAGTTCTA
Terminal_Bottom_LigateOdd_Stagger	NYBot33_Stg	GCCTATCCT	CAGACGTGTGCTCTTCCGATCTGCCTATCCT
Terminal_Bottom_LigateOdd_Stagger	NYBot34_Stg	GGCGGCAATA	CAGACGTGTGCTCTTCCGATCTGGCGGCAATA
Terminal_Bottom_LigateOdd_Stagger	NYBot35_Stg	TTACGGCCAA	CAGACGTGTGCTCTTCCGATCTTTACGGCCAA
Terminal_Bottom_LigateOdd_Stagger	NYBot36_Stg	GGAATCCTCA	CAGACGTGTGCTCTTCCGATCTGGAATCCTCA
Terminal_Bottom_LigateOdd_Stagger	NYBot37_Stg	CTCATGTTAA	CAGACGTGTGCTCTTCCGATCTCTCATGTTAA
Terminal_Bottom_LigateOdd_Stagger	NYBot38_Stg	GATTGATTA	CAGACGTGTGCTCTTCCGATCTGATTGATTA
Terminal_Bottom_LigateOdd_Stagger	NYBot39_Stg	ATATACTGA	CAGACGTGTGCTCTTCCGATCTATATACTGA
Terminal_Bottom_LigateOdd_Stagger	NYBot40_Stg	CGCTCCTTC	CAGACGTGTGCTCTTCCGATCTCGCTCCTTC
Terminal_Bottom_LigateOdd_Stagger	NYBot41_Stg	AGTACGCGAT	CAGACGTGTGCTCTTCCGATCTAGTACGCGAT
Terminal_Bottom_LigateOdd_Stagger	NYBot42_Stg	CACGGATCTG	CAGACGTGTGCTCTTCCGATCTCACGGATCTG
Terminal_Bottom_LigateOdd_Stagger	NYBot43_Stg	TCCTGGTATC	CAGACGTGTGCTCTTCCGATCTTCCTGGTATC
Terminal_Bottom_LigateOdd_Stagger	NYBot44_Stg	AGGTCTTCG	CAGACGTGTGCTCTTCCGATCTAGGTCTTCG
Terminal_Bottom_LigateOdd_Stagger	NYBot45_Stg	TTCCAAGGCC	CAGACGTGTGCTCTTCCGATCTTTCCAAGGCC
Terminal_Bottom_LigateOdd_Stagger	NYBot46_Stg	GTAGCATCC	CAGACGTGTGCTCTTCCGATCTGTAGCATCC
Terminal_Bottom_LigateOdd_Stagger	NYBot47_Stg	CCTACGGCC	CAGACGTGTGCTCTTCCGATCTCCTACGGCC
Terminal_Bottom_LigateOdd_Stagger	NYBot48_Stg	TACGCTTGA	CAGACGTGTGCTCTTCCGATCTTACGCTTGA
Terminal_Bottom_LigateOdd_Stagger	NYBot49_Stg	CTTGGCGACCAT	CAGACGTGTGCTCTTCCGATCTCTTGGCGACCAT
Terminal_Bottom_LigateOdd_Stagger	NYBot50_Stg	CTTAAACCGGCA	CAGACGTGTGCTCTTCCGATCTCTTAAACCGGCA
Terminal_Bottom_LigateOdd_Stagger	NYBot51_Stg	CTCTGTTGTTGC	CAGACGTGTGCTCTTCCGATCTCTCTGTTGTTGC
Terminal_Bottom_LigateOdd_Stagger	NYBot52_Stg	CTCTGTTGTTTG	CAGACGTGTGCTCTTCCGATCTCTCTGTTGTTTG
Terminal_Bottom_LigateOdd_Stagger	NYBot53_Stg	CGTTTCACATAT	CAGACGTGTGCTCTTCCGATCTCGTTTCACATAT
Terminal_Bottom_LigateOdd_Stagger	NYBot54_Stg	CGCTTCTAAGCA	CAGACGTGTGCTCTTCCGATCTCGCTTCTAAGCA
Terminal_Bottom_LigateOdd_Stagger	NYBot55_Stg	CCGACTGCTAGC	CAGACGTGTGCTCTTCCGATCTCCGACTGCTAGC
Terminal_Bottom_LigateOdd_Stagger	NYBot56_Stg	CATCCAGTCATG	CAGACGTGTGCTCTTCCGATCTCATCCAGTCATG
Terminal_Bottom_LigateOdd_Stagger	NYBot57_Stg	CAGCTCCGAAGT	CAGACGTGTGCTCTTCCGATCTCAGCTCCGAAGT
Terminal_Bottom_LigateOdd_Stagger	NYBot58_Stg	CAACAACGTTAA	CAGACGTGTGCTCTTCCGATCTCAACAACGTTAA
Terminal_Bottom_LigateOdd_Stagger	NYBot59_Stg	CATTAGACTAGC	CAGACGTGTGCTCTTCCGATCTCATTAGACTAGC
Terminal_Bottom_LigateOdd_Stagger	NYBot60_Stg	CCAGCACTTGCG	CAGACGTGTGCTCTTCCGATCTCCAGCACTTGCG
Terminal_Bottom_LigateOdd_Stagger	NYBot61_Stg	GTGATGTACGTT	CAGACGTGTGCTCTTCCGATCTGTGATGTACGTT
Terminal_Bottom_LigateOdd_Stagger	NYBot62_Stg	GTAGTCGTCCCA	CAGACGTGTGCTCTTCCGATCTGTAGTCGTCCCA
Terminal_Bottom_LigateOdd_Stagger	NYBot63_Stg	GGTCCAACTCGC	CAGACGTGTGCTCTTCCGATCTGGTCCAACTCGC
Terminal_Bottom_LigateOdd_Stagger	NYBot64_Stg	GGCGCCATACAG	CAGACGTGTGCTCTTCCGATCTGGCGCCATACAG
Terminal_Bottom_LigateOdd_Stagger	NYBot65_Stg	GGAGAGCACCCT	CAGACGTGTGCTCTTCCGATCTGGAGAGCACCCT
Terminal_Bottom_LigateOdd_Stagger	NYBot66_Stg	GCTCTGCAATGA	CAGACGTGTGCTCTTCCGATCTGCTCTGCAATGA
Terminal_Bottom_LigateOdd_Stagger	NYBot67_Stg	GCGAACGTTTCC	CAGACGTGTGCTCTTCCGATCTGCGAACGTTTCC
Terminal_Bottom_LigateOdd_Stagger	NYBot68_Stg	GCATCGAGTCGG	CAGACGTGTGCTCTTCCGATCTGCATCGAGTCGG
Terminal_Bottom_LigateOdd_Stagger	NYBot69_Stg	GATGACGTAGAT	CAGACGTGTGCTCTTCCGATCTGATGACGTAGAT
Terminal_Bottom_LigateOdd_Stagger	NYBot70_Stg	GAGCAGAACATA	CAGACGTGTGCTCTTCCGATCTGAGCAGAACATA
Terminal_Bottom_LigateOdd_Stagger	NYBot71_Stg	GACACCCCGTGC	CAGACGTGTGCTCTTCCGATCTGACACCCCGTGC
Terminal_Bottom_LigateOdd_Stagger	NYBot72_Stg	GTTGTTCGACCG	CAGACGTGTGCTCTTCCGATCTGTTGTTCGACCG
Terminal_Bottom_LigateOdd_Stagger	NYBot73_Stg	TTTATATGTGT	CAGACGTGTGCTCTTCCGATCTTTTATATGTGT
Terminal_Bottom_LigateOdd_Stagger	NYBot74_Stg	TTGACATCACA	CAGACGTGTGCTCTTCCGATCTTTGACATCACA
Terminal_Bottom_LigateOdd_Stagger	NYBot75_Stg	TTATCCCCCAC	CAGACGTGTGCTCTTCCGATCTTTATCCCCCAC
Terminal_Bottom_LigateOdd_Stagger	NYBot76_Stg	TGTGACCAGTG	CAGACGTGTGCTCTTCCGATCTTGTGACCAGTG
Terminal_Bottom_LigateOdd_Stagger	NYBot77_Stg	TGGATGCTCCT	CAGACGTGTGCTCTTCCGATCTTGGATGCTCCT
Terminal_Bottom_LigateOdd_Stagger	NYBot78_Stg	TGAGTAATTAA	CAGACGTGTGCTCTTCCGATCTTGAGTAATTAA
Terminal_Bottom_LigateOdd_Stagger	NYBot79_Stg	TCTCATATTGG	CAGACGTGTGCTCTTCCGATCTTCTCATATTGG
Terminal_Bottom_LigateOdd_Stagger	NYBot80_Stg	TCGAACATATG	CAGACGTGTGCTCTTCCGATCTTCGAACATATG
Terminal_Bottom_LigateOdd_Stagger	NYBot81_Stg	TCATACTACAT	CAGACGTGTGCTCTTCCGATCTTCATACTACAT
Terminal_Bottom_LigateOdd_Stagger	NYBot82_Stg	TATCGACGTCA	CAGACGTGTGCTCTTCCGATCTTATCGACGTCA
Terminal_Bottom_LigateOdd_Stagger	NYBot83_Stg	TAGACCAGGGC	CAGACGTGTGCTCTTCCGATCTTAGACCAGGGC
Terminal_Bottom_LigateOdd_Stagger	NYBot84_Stg	TAATGTGGATG	CAGACGTGTGCTCTTCCGATCTTAATGTGGATG
Terminal_Bottom_LigateOdd_Stagger	NYBot85_Stg	ATTAGTATGTT	CAGACGTGTGCTCTTCCGATCTATTAGTATGTT
Terminal_Bottom_LigateOdd_Stagger	NYBot86_Stg	ATCCTATCCAA	CAGACGTGTGCTCTTCCGATCTATCCTATCCAA
Terminal_Bottom_LigateOdd_Stagger	NYBot87_Stg	ATTACACGCCC	CAGACGTGTGCTCTTCCGATCTATTACACGCCC
Terminal_Bottom_LigateOdd_Stagger	NYBot88_Stg	AGTTGAAATAG	CAGACGTGTGCTCTTCCGATCTAGTTGAAATAG
Terminal_Bottom_LigateOdd_Stagger	NYBot89_Stg	AGGCCCTTTGT	CAGACGTGTGCTCTTCCGATCTAGGCCCTTTGT
Terminal_Bottom_LigateOdd_Stagger	NYBot90_Stg	AGATGAGCGTA	CAGACGTGTGCTCTTCCGATCTAGATGAGCGTA
Terminal_Bottom_LigateOdd_Stagger	NYBot91_Stg	ACTCTTCTTCC	CAGACGTGTGCTCTTCCGATCTACTCTTCTTCC
Terminal_Bottom_LigateOdd_Stagger	NYBot92_Stg	ACCATTATTGG	CAGACGTGTGCTCTTCCGATCTACCATTATTGG
Terminal_Bottom_LigateOdd_Stagger	NYBot93_Stg	ACAGACTCAGT	CAGACGTGTGCTCTTCCGATCTACAGACTCAGT
Terminal_Bottom_LigateOdd_Stagger	NYBot94_Stg	AATTGTCTGTA	CAGACGTGTGCTCTTCCGATCTAATTGTCTGTA
Terminal_Bottom_LigateOdd_Stagger	NYBot95_Stg	AAGGCCTCACC	CAGACGTGTGCTCTTCCGATCTAAGGCCTCACC
Terminal_Bottom_LigateOdd_Stagger	NYBot96_Stg	AACGAACAGAG	CAGACGTGTGCTCTTCCGATCTAACGAACAGAG
DPM_Bottom_Plate6	DPM6bot1		/5Phos/TGACTTGTCATGTCTTCCGATCTTGGGTGTTTT
DPM_Bottom_Plate6	DPM6bot2		/5Phos/TGACTTGTCATGTCTTCCGATCTTCGAGTCTTT
DPM_Bottom_Plate6	DPM6bot3		/5Phos/TGACTTGTCATGTCTTCCGATCTGCAGATTGTT
DPM_Bottom_Plate6	DPM6bot4		/5Phos/TGACTTGTCATGTCTTCCGATCTTCTATGCGTT
DPM_Bottom_Plate6	DPM6bot5		/5Phos/TGACTTGTCATGTCTTCCGATCTGGACTTTCTT
DPM_Bottom_Plate6	DPM6bot6		/5Phos/TGACTTGTCATGTCTTCCGATCTGCCGTGCCTT
DPM_Bottom_Plate6	DPM6bot7		/5Phos/TGACTTGTCATGTCTTCCGATCTAGTGTTTATT
DPM_Bottom_Plate6	DPM6bot8		/5Phos/TGACTTGTCATGTCTTCCGATCTGACTGGCATT
DPM_Bottom_Plate6	DPM6bot9		/5Phos/TGACTTGTCATGTCTTCCGATCTTGACATGTTT
DPM_Bottom_Plate6	DPM6bot10		/5Phos/TGACTTGTCATGTCTTCCGATCTCCCTTTATTT
DPM_Bottom_Plate6	DPM6bot11		/5Phos/TGACTTGTCATGTCTTCCGATCTTTGGTTGGTT
DPM_Bottom_Plate6	DPM6bot12		/5Phos/TGACTTGTCATGTCTTCCGATCTATAAGTAGTT
DPM_Bottom_Plate6	DPM6bot13		/5Phos/TGACTTGTCATGTCTTCCGATCTCCTCTTGCTT
DPM_Bottom_Plate6	DPM6bot14		/5Phos/TGACTTGTCATGTCTTCCGATCTAAGCTTACTT
DPM_Bottom_Plate6	DPM6bot15		/5Phos/TGACTTGTCATGTCTTCCGATCTGGCATTGATT
DPM_Bottom_Plate6	DPM6bot16		/5Phos/TGACTTGTCATGTCTTCCGATCTTGCCTGAATT
DPM_Bottom_Plate6	DPM6bot17		/5Phos/TGACTTGTCATGTCTTCCGATCTGCGCGGTTTT
DPM_Bottom_Plate6	DPM6bot18		/5Phos/TGACTTGTCATGTCTTCCGATCTCAGCATCTTT
DPM_Bottom_Plate6	DPM6bot19		/5Phos/TGACTTGTCATGTCTTCCGATCTTGCAATTGTT
DPM_Bottom_Plate6	DPM6bot20		/5Phos/TGACTTGTCATGTCTTCCGATCTGGCCAGCGTT
DPM_Bottom_Plate6	DPM6bot21		/5Phos/TGACTTGTCATGTCTTCCGATCTATCCATTCTT
DPM_Bottom_Plate6	DPM6bot22		/5Phos/TGACTTGTCATGTCTTCCGATCTAATCTGCCTT
DPM_Bottom_Plate6	DPM6bot23		/5Phos/TGACTTGTCATGTCTTCCGATCTCCGATTTATT
DPM_Bottom_Plate6	DPM6bot24		/5Phos/TGACTTGTCATGTCTTCCGATCTCGGGGGCATT
DPM_Bottom_Plate6	DPM6bot25		/5Phos/TGACTTGTCATGTCTTCCGATCTCGCCGGGTTT
DPM_Bottom_Plate6	DPM6bot26		/5Phos/TGACTTGTCATGTCTTCCGATCTAGGTCTATTT
DPM_Bottom_Plate6	DPM6bot27		/5Phos/TGACTTGTCATGTCTTCCGATCTGACGCTGGTT
DPM_Bottom_Plate6	DPM6bot28		/5Phos/TGACTTGTCATGTCTTCCGATCTCATAATAGTT
DPM_Bottom_Plate6	DPM6bot29		/5Phos/TGACTTGTCATGTCTTCCGATCTATGTGGGCTT
DPM_Bottom_Plate6	DPM6bot30		/5Phos/TGACTTGTCATGTCTTCCGATCTGCGACTACTT
DPM_Bottom_Plate6	DPM6bot31		/5Phos/TGACTTGTCATGTCTTCCGATCTGTACTGGATT
DPM_Bottom_Plate6	DPM6bot32		/5Phos/TGACTTGTCATGTCTTCCGATCTAAAGCGAATT
DPM_Bottom_Plate6	DPM6bot33		/5Phos/TGACTTGTCATGTCTTCCGATCTCTGTCGTTTT
DPM_Bottom_Plate6	DPM6bot34		/5Phos/TGACTTGTCATGTCTTCCGATCTAGAAGGCTTT
DPM_Bottom_Plate6	DPM6bot35		/5Phos/TGACTTGTCATGTCTTCCGATCTTTACAGTGTT
DPM_Bottom_Plate6	DPM6bot36		/5Phos/TGACTTGTCATGTCTTCCGATCTCTGATCCGTT
DPM_Bottom_Plate6	DPM6bot37		/5Phos/TGACTTGTCATGTCTTCCGATCTCCTAGGTCTT
DPM_Bottom_Plate6	DPM6bot38		/5Phos/TGACTTGTCATGTCTTCCGATCTCTACCGCCTT
DPM_Bottom_Plate6	DPM6bot39		/5Phos/TGACTTGTCATGTCTTCCGATCTTACGGTTATT
DPM_Bottom_Plate6	DPM6bot40		/5Phos/TGACTTGTCATGTCTTCCGATCTTTTGCGCATT
DPM_Bottom_Plate6	DPM6bot41		/5Phos/TGACTTGTCATGTCTTCCGATCTGAAGAGGTTT
DPM_Bottom_Plate6	DPM6bot42		/5Phos/TGACTTGTCATGTCTTCCGATCTGGTTTGATTT
DPM_Bottom_Plate6	DPM6bot43		/5Phos/TGACTTGTCATGTCTTCCGATCTACGAATGGTT
DPM_Bottom_Plate6	DPM6bot44		/5Phos/TGACTTGTCATGTCTTCCGATCTGTTGGGAGTT
DPM_Bottom_Plate6	DPM6bot45		/5Phos/TGACTTGTCATGTCTTCCGATCTTCGCCGGCTT
DPM_Bottom_Plate6	DPM6bot46		/5Phos/TGACTTGTCATGTCTTCCGATCTCCTTCCACTT
DPM_Bottom_Plate6	DPM6bot47		/5Phos/TGACTTGTCATGTCTTCCGATCTCCCGCGGATT
DPM_Bottom_Plate6	DPM6bot48		/5Phos/TGACTTGTCATGTCTTCCGATCTGCTAAGAATT
DPM_Bottom_Plate6	DPM6bot49		/5Phos/TGACTTGTCATGTCTTCCGATCTAAGAAGTTTT
DPM_Bottom_Plate6	DPM6bot50		/5Phos/TGACTTGTCATGTCTTCCGATCTGAACTCCTTT
DPM_Bottom_Plate6	DPM6bot51		/5Phos/TGACTTGTCATGTCTTCCGATCTGTCTTCTGTT
DPM_Bottom_Plate6	DPM6bot52		/5Phos/TGACTTGTCATGTCTTCCGATCTTGGCCCCGTT
DPM_Bottom_Plate6	DPM6bot53		/5Phos/TGACTTGTCATGTCTTCCGATCTTTGAGCTCTT
DPM_Bottom_Plate6	DPM6bot54		/5Phos/TGACTTGTCATGTCTTCCGATCTTGTTAGCCTT
DPM_Bottom_Plate6	DPM6bot55		/5Phos/TGACTTGTCATGTCTTCCGATCTAAACGCTATT
DPM_Bottom_Plate6	DPM6bot56		/5Phos/TGACTTGTCATGTCTTCCGATCTCCCCGCCATT
DPM_Bottom_Plate6	DPM6bot57		/5Phos/TGACTTGTCATGTCTTCCGATCTTTCAAGGTTT
DPM_Bottom_Plate6	DPM6bot58		/5Phos/TGACTTGTCATGTCTTCCGATCTCTTCTCATTT
DPM_Bottom_Plate6	DPM6bot59		/5Phos/TGACTTGTCATGTCTTCCGATCTGCATCGGGTT
DPM_Bottom_Plate6	DPM6bot60		/5Phos/TGACTTGTCATGTCTTCCGATCTTACTCGAGTT
DPM_Bottom_Plate6	DPM6bot61		/5Phos/TGACTTGTCATGTCTTCCGATCTCACTAGGCTT
DPM_Bottom_Plate6	DPM6bot62		/5Phos/TGACTTGTCATGTCTTCCGATCTTAACACACTT
DPM_Bottom_Plate6	DPM6bot63		/5Phos/TGACTTGTCATGTCTTCCGATCTCGATTCGATT
DPM_Bottom_Plate6	DPM6bot64		/5Phos/TGACTTGTCATGTCTTCCGATCTGGGCGCAATT
DPM_Bottom_Plate6	DPM6bot65		/5Phos/TGACTTGTCATGTCTTCCGATCTTCCCTCTTTT
DPM_Bottom_Plate6	DPM6bot66		/5Phos/TGACTTGTCATGTCTTCCGATCTACTTGCCTTT
DPM_Bottom_Plate6	DPM6bot67		/5Phos/TGACTTGTCATGTCTTCCGATCTAGCGCCTGTT
DPM_Bottom_Plate6	DPM6bot68		/5Phos/TGACTTGTCATGTCTTCCGATCTACGTTACGTT
DPM_Bottom_Plate6	DPM6bot69		/5Phos/TGACTTGTCATGTCTTCCGATCTGACAACTCTT
DPM_Bottom_Plate6	DPM6bot70		/5Phos/TGACTTGTCATGTCTTCCGATCTATAGTCCCTT
DPM_Bottom_Plate6	DPM6bot71		/5Phos/TGACTTGTCATGTCTTCCGATCTACCAGATATT
DPM_Bottom_Plate6	DPM6bot72		/5Phos/TGACTTGTCATGTCTTCCGATCTAGTACCCATT
DPM_Bottom_Plate6	DPM6bot73		/5Phos/TGACTTGTCATGTCTTCCGATCTTATGCCGTTT
DPM_Bottom_Plate6	DPM6bot74		/5Phos/TGACTTGTCATGTCTTCCGATCTTGATGCATTT
DPM_Bottom_Plate6	DPM6bot75		/5Phos/TGACTTGTCATGTCTTCCGATCTTAAAGAGGTT
DPM_Bottom_Plate6	DPM6bot76		/5Phos/TGACTTGTCATGTCTTCCGATCTACGGGCAGTT
DPM_Bottom_Plate6	DPM6bot77		/5Phos/TGACTTGTCATGTCTTCCGATCTTGTATCGCTT
DPM_Bottom_Plate6	DPM6bot78		/5Phos/TGACTTGTCATGTCTTCCGATCTCAAATAACTT
DPM_Bottom_Plate6	DPM6bot79		/5Phos/TGACTTGTCATGTCTTCCGATCTTTTCGCGATT
DPM_Bottom_Plate6	DPM6bot80		/5Phos/TGACTTGTCATGTCTTCCGATCTTCAACCAATT
DPM_Bottom_Plate6	DPM6bot81		/5Phos/TGACTTGTCATGTCTTCCGATCTGTATGATTTT
DPM_Bottom_Plate6	DPM6bot82		/5Phos/TGACTTGTCATGTCTTCCGATCTAACCCACTTT
DPM_Bottom_Plate6	DPM6bot83		/5Phos/TGACTTGTCATGTCTTCCGATCTCATTTATGTT
DPM_Bottom_Plate6	DPM6bot84		/5Phos/TGACTTGTCATGTCTTCCGATCTCGCTCACGTT
DPM_Bottom_Plate6	DPM6bot85		/5Phos/TGACTTGTCATGTCTTCCGATCTTGTCGATCTT
DPM_Bottom_Plate6	DPM6bot86		/5Phos/TGACTTGTCATGTCTTCCGATCTGGATCCCCTT
DPM_Bottom_Plate6	DPM6bot87		/5Phos/TGACTTGTCATGTCTTCCGATCTGAAACATATT
DPM_Bottom_Plate6	DPM6bot88		/5Phos/TGACTTGTCATGTCTTCCGATCTTCACAACATT
DPM_Bottom_Plate6	DPM6bot89		/5Phos/TGACTTGTCATGTCTTCCGATCTATTATAGTTT
DPM_Bottom_Plate6	DPM6bot90		/5Phos/TGACTTGTCATGTCTTCCGATCTCGAGCAATTT
DPM_Bottom_Plate6	DPM6bot91		/5Phos/TGACTTGTCATGTCTTCCGATCTGTGCCAGGTT
DPM_Bottom_Plate6	DPM6bot92		/5Phos/TGACTTGTCATGTCTTCCGATCTGAGTACAGTT
DPM_Bottom_Plate6	DPM6bot93		/5Phos/TGACTTGTCATGTCTTCCGATCTGAGGGAGCTT
DPM_Bottom_Plate6	DPM6bot94		/5Phos/TGACTTGTCATGTCTTCCGATCTTCCAAAACTT
DPM_Bottom_Plate6	DPM6bot95		/5Phos/TGACTTGTCATGTCTTCCGATCTAATTAAGATT
DPM_Bottom_Plate6	DPM6bot96		/5Phos/TGACTTGTCATGTCTTCCGATCTATGAACAATT
DPM_Top_Plate6	Plate6-A1	AACACCCA	/5Phos/AAACACCCAAGATCGGAAGAGCGTCGTGTA/3SpC3/
DPM_Top_Plate6	Plate6-B1	AGACTCGA	/5Phos/AAGACTCGAAGATCGGAAGAGCGTCGTGTA/3SpC3/
DPM_Top_Plate6	Plate6-C1	CAATCTGC	/5Phos/ACAATCTGCAGATCGGAAGAGCGTCGTGTA/3SpC3/
DPM_Top_Plate6	Plate6-D1	CGCATAGA	/5Phos/ACGCATAGAAGATCGGAAGAGCGTCGTGTA/3SpC3/
DPM_Top_Plate6	Plate6-E1	GAAAGTCC	/5Phos/AGAAAGTCCAGATCGGAAGAGCGTCGTGTA/3SpC3/
DPM_Top_Plate6	Plate6-F1	GGCACGGC	/5Phos/AGGCACGGCAGATCGGAAGAGCGTCGTGTA/3SpC3/
DPM_Top_Plate6	Plate6-G1	TAAACACT	/5Phos/ATAAACACTAGATCGGAAGAGCGTCGTGTA/3SpC3/
DPM_Top_Plate6	Plate6-H1	TGCCAGTC	/5Phos/ATGCCAGTCAGATCGGAAGAGCGTCGTGTA/3SpC3/
DPM_Top_Plate6	Plate6-A2	ACATGTCA	/5Phos/AACATGTCAAGATCGGAAGAGCGTCGTGTA/3SpC3/
DPM_Top_Plate6	Plate6-B2	ATAAAGGG	/5Phos/AATAAAGGGAGATCGGAAGAGCGTCGTGTA/3SpC3/
DPM_Top_Plate6	Plate6-C2	CCAACCAA	/5Phos/ACCAACCAAAGATCGGAAGAGCGTCGTGTA/3SpC3/
DPM_Top_Plate6	Plate6-D2	CTACTTAT	/5Phos/ACTACTTATAGATCGGAAGAGCGTCGTGTA/3SpC3/
DPM_Top_Plate6	Plate6-E2	GCAAGAGG	/5Phos/AGCAAGAGGAGATCGGAAGAGCGTCGTGTA/3SpC3/
DPM_Top_Plate6	Plate6-F2	GTAAGCTT	/5Phos/AGTAAGCTTAGATCGGAAGAGCGTCGTGTA/3SpC3/
DPM_Top_Plate6	Plate6-G2	TCAATGCC	/5Phos/ATCAATGCCAGATCGGAAGAGCGTCGTGTA/3SpC3/
DPM_Top_Plate6	Plate6-H2	TTCAGGCA	/5Phos/ATTCAGGCAAGATCGGAAGAGCGTCGTGTA/3SpC3/
DPM_Top_Plate6	Plate6-A3	AACCGCGC	/5Phos/AAACCGCGCAGATCGGAAGAGCGTCGTGTA/3SpC3/
DPM_Top_Plate6	Plate6-B3	AGATGCTG	/5Phos/AAGATGCTGAGATCGGAAGAGCGTCGTGTA/3SpC3/
DPM_Top_Plate6	Plate6-C3	CAATTGCA	/5Phos/ACAATTGCAAGATCGGAAGAGCGTCGTGTA/3SpC3/
DPM_Top_Plate6	Plate6-D3	CGCTGGCC	/5Phos/ACGCTGGCCAGATCGGAAGAGCGTCGTGTA/3SpC3/
DPM_Top_Plate6	Plate6-E3	GAATGGAT	/5Phos/AGAATGGATAGATCGGAAGAGCGTCGTGTA/3SpC3/
DPM_Top_Plate6	Plate6-F3	GGCAGATT	/5Phos/AGGCAGATTAGATCGGAAGAGCGTCGTGTA/3SpC3/
DPM_Top_Plate6	Plate6-G3	TAAATCGG	/5Phos/ATAAATCGGAGATCGGAAGAGCGTCGTGTA/3SpC3/
DPM_Top_Plate6	Plate6-H3	TGCCCCCG	/5Phos/ATGCCCCCGAGATCGGAAGAGCGTCGTGTA/3SpC3/
DPM_Top_Plate6	Plate6-A4	ACCCGGCG	/5Phos/AACCCGGCGAGATCGGAAGAGCGTCGTGTA/3SpC3/
DPM_Top_Plate6	Plate6-B4	ATAGACCT	/5Phos/AATAGACCTAGATCGGAAGAGCGTCGTGTA/3SpC3/
DPM_Top_Plate6	Plate6-C4	CCAGCGTC	/5Phos/ACCAGCGTCAGATCGGAAGAGCGTCGTGTA/3SpC3/
DPM_Top_Plate6	Plate6-D4	CTATTATG	/5Phos/ACTATTATGAGATCGGAAGAGCGTCGTGTA/3SpC3/
DPM_Top_Plate6	Plate6-E4	GCCCACAT	/5Phos/AGCCCACATAGATCGGAAGAGCGTCGTGTA/3SpC3/
DPM_Top_Plate6	Plate6-F4	GTAGTCGC	/5Phos/AGTAGTCGCAGATCGGAAGAGCGTCGTGTA/3SpC3/
DPM_Top_Plate6	Plate6-G4	TCCAGTAC	/5Phos/ATCCAGTACAGATCGGAAGAGCGTCGTGTA/3SpC3/
DPM_Top_Plate6	Plate6-H4	TTCGCTTT	/5Phos/ATTCGCTTTAGATCGGAAGAGCGTCGTGTA/3SpC3/
DPM_Top_Plate6	Plate6-A5	AACGACAG	/5Phos/AAACGACAGAGATCGGAAGAGCGTCGTGTA/3SpC3/
DPM_Top_Plate6	Plate6-B5	AGCCTTCT	/5Phos/AAGCCTTCTAGATCGGAAGAGCGTCGTGTA/3SpC3/
DPM_Top_Plate6	Plate6-C5	CACTGTAA	/5Phos/ACACTGTAAAGATCGGAAGAGCGTCGTGTA/3SpC3/
DPM_Top_Plate6	Plate6-D5	CGGATCAG	/5Phos/ACGGATCAGAGATCGGAAGAGCGTCGTGTA/3SpC3/
DPM_Top_Plate6	Plate6-E5	GACCTAGG	/5Phos/AGACCTAGGAGATCGGAAGAGCGTCGTGTA/3SpC3/
DPM_Top_Plate6	Plate6-F5	GGCGGTAG	/5Phos/AGGCGGTAGAGATCGGAAGAGCGTCGTGTA/3SpC3/
DPM_Top_Plate6	Plate6-G5	TAACCGTA	/5Phos/ATAACCGTAAGATCGGAAGAGCGTCGTGTA/3SpC3/
DPM_Top_Plate6	Plate6-H5	TGCGCAAA	/5Phos/ATGCGCAAAAGATCGGAAGAGCGTCGTGTA/3SpC3/
DPM_Top_Plate6	Plate6-A6	ACCTCTTC	/5Phos/AACCTCTTCAGATCGGAAGAGCGTCGTGTA/3SpC3/
DPM_Top_Plate6	Plate6-B6	ATCAAACC	/5Phos/AATCAAACCAGATCGGAAGAGCGTCGTGTA/3SpC3/
DPM_Top_Plate6	Plate6-C6	CCATTCGT	/5Phos/ACCATTCGTAGATCGGAAGAGCGTCGTGTA/3SpC3/
DPM_Top_Plate6	Plate6-D6	CTCCCAAC	/5Phos/ACTCCCAACAGATCGGAAGAGCGTCGTGTA/3SpC3/
DPM_Top_Plate6	Plate6-E6	GCCGGCGA	/5Phos/AGCCGGCGAAGATCGGAAGAGCGTCGTGTA/3SpC3/
DPM_Top_Plate6	Plate6-F6	GTGGAAGG	/5Phos/AGTGGAAGGAGATCGGAAGAGCGTCGTGTA/3SpC3/
DPM_Top_Plate6	Plate6-G6	TCCGCGGG	/5Phos/ATCCGCGGGAGATCGGAAGAGCGTCGTGTA/3SpC3/
DPM_Top_Plate6	Plate6-H6	TTCTTAGC	/5Phos/ATTCTTAGCAGATCGGAAGAGCGTCGTGTA/3SpC3/
DPM_Top_Plate6	Plate6-A7	AACTTCTT	/5Phos/AAACTTCTTAGATCGGAAGAGCGTCGTGTA/3SpC3/
DPM_Top_Plate6	Plate6-B7	AGGAGTTC	/5Phos/AAGGAGTTCAGATCGGAAGAGCGTCGTGTA/3SpC3/
DPM_Top_Plate6	Plate6-C7	CAGAAGAC	/5Phos/ACAGAAGACAGATCGGAAGAGCGTCGTGTA/3SpC3/
DPM_Top_Plate6	Plate6-D7	CGGGGCCA	/5Phos/ACGGGGCCAAGATCGGAAGAGCGTCGTGTA/3SpC3/
DPM_Top_Plate6	Plate6-E7	GAGCTCAA	/5Phos/AGAGCTCAAAGATCGGAAGAGCGTCGTGTA/3SpC3/
DPM_Top_Plate6	Plate6-F7	GGCTAACA	/5Phos/AGGCTAACAAGATCGGAAGAGCGTCGTGTA/3SpC3/
DPM_Top_Plate6	Plate6-G7	TAGCGTTT	/5Phos/ATAGCGTTTAGATCGGAAGAGCGTCGTGTA/3SpC3/
DPM_Top_Plate6	Plate6-H7	TGGCGGGG	/5Phos/ATGGCGGGGAGATCGGAAGAGCGTCGTGTA/3SpC3/
DPM_Top_Plate6	Plate6-A8	ACCTTGAA	/5Phos/AACCTTGAAAGATCGGAAGAGCGTCGTGTA/3SpC3/
DPM_Top_Plate6	Plate6-B8	ATGAGAAG	/5Phos/AATGAGAAGAGATCGGAAGAGCGTCGTGTA/3SpC3/
DPM_Top_Plate6	Plate6-C8	CCCGATGC	/5Phos/ACCCGATGCAGATCGGAAGAGCGTCGTGTA/3SpC3/
DPM_Top_Plate6	Plate6-D8	CTCGAGTA	/5Phos/ACTCGAGTAAGATCGGAAGAGCGTCGTGTA/3SpC3/
DPM_Top_Plate6	Plate6-E8	GCCTAGTG	/5Phos/AGCCTAGTGAGATCGGAAGAGCGTCGTGTA/3SpC3/
DPM_Top_Plate6	Plate6-F8	GTGTGTTA	/5Phos/AGTGTGTTAAGATCGGAAGAGCGTCGTGTA/3SpC3/
DPM_Top_Plate6	Plate6-G8	TCGAATCG	/5Phos/ATCGAATCGAGATCGGAAGAGCGTCGTGTA/3SpC3/
DPM_Top_Plate6	Plate6-H8	TTGCGCCC	/5Phos/ATTGCGCCCAGATCGGAAGAGCGTCGTGTA/3SpC3/
DPM_Top_Plate6	Plate6-A9	AAGAGGGA	/5Phos/AAAGAGGGAAGATCGGAAGAGCGTCGTGTA/3SpC3/
DPM_Top_Plate6	Plate6-B9	AGGCAAGT	/5Phos/AAGGCAAGTAGATCGGAAGAGCGTCGTGTA/3SpC3/
DPM_Top_Plate6	Plate6-C9	CAGGCGCT	/5Phos/ACAGGCGCTAGATCGGAAGAGCGTCGTGTA/3SpC3/
DPM_Top_Plate6	Plate6-D9	CGTAACGT	/5Phos/ACGTAACGTAGATCGGAAGAGCGTCGTGTA/3SpC3/
DPM_Top_Plate6	Plate6-E9	GAGTTGTC	/5Phos/AGAGTTGTCAGATCGGAAGAGCGTCGTGTA/3SpC3/
DPM_Top_Plate6	Plate6-F9	GGGACTAT	/5Phos/AGGGACTATAGATCGGAAGAGCGTCGTGTA/3SpC3/
DPM_Top_Plate6	Plate6-G9	TATCTGGT	/5Phos/ATATCTGGTAGATCGGAAGAGCGTCGTGTA/3SpC3/
DPM_Top_Plate6	Plate6-H9	TGGGTACT	/5Phos/ATGGGTACTAGATCGGAAGAGCGTCGTGTA/3SpC3/
DPM_Top_Plate6	Plate6-A10	ACGGCATA	/5Phos/AACGGCATAAGATCGGAAGAGCGTCGTGTA/3SpC3/
DPM_Top_Plate6	Plate6-B10	ATGCATCA	/5Phos/AATGCATCAAGATCGGAAGAGCGTCGTGTA/3SpC3/
DPM_Top_Plate6	Plate6-C10	CCTCTTTA	/5Phos/ACCTCTTTAAGATCGGAAGAGCGTCGTGTA/3SpC3/
DPM_Top_Plate6	Plate6-D10	CTGCCCGT	/5Phos/ACTGCCCGTAGATCGGAAGAGCGTCGTGTA/3SpC3/
DPM_Top_Plate6	Plate6-E10	GCGATACA	/5Phos/AGCGATACAAGATCGGAAGAGCGTCGTGTA/3SpC3/
DPM_Top_Plate6	Plate6-F10	GTTATTTG	/5Phos/AGTTATTTGAGATCGGAAGAGCGTCGTGTA/3SpC3/
DPM_Top_Plate6	Plate6-G10	TCGCGAAA	/5Phos/ATCGCGAAAAGATCGGAAGAGCGTCGTGTA/3SpC3/
DPM_Top_Plate6	Plate6-H10	TTGGTTGA	/5Phos/ATTGGTTGAAGATCGGAAGAGCGTCGTGTA/3SpC3/
DPM_Top_Plate6	Plate6-A11	AATCATAC	/5Phos/AAATCATACAGATCGGAAGAGCGTCGTGTA/3SpC3/
DPM_Top_Plate6	Plate6-B11	AGTGGGTT	/5Phos/AAGTGGGTTAGATCGGAAGAGCGTCGTGTA/3SpC3/
DPM_Top_Plate6	Plate6-C11	CATAAATG	/5Phos/ACATAAATGAGATCGGAAGAGCGTCGTGTA/3SpC3/
DPM_Top_Plate6	Plate6-D11	CGTGAGCG	/5Phos/ACGTGAGCGAGATCGGAAGAGCGTCGTGTA/3SpC3/
DPM_Top_Plate6	Plate6-E11	GATCGACA	/5Phos/AGATCGACAAGATCGGAAGAGCGTCGTGTA/3SpC3/
DPM_Top_Plate6	Plate6-F11	GGGGATCC	/5Phos/AGGGGATCCAGATCGGAAGAGCGTCGTGTA/3SpC3/
DPM_Top_Plate6	Plate6-G11	TATGTTTC	/5Phos/ATATGTTTCAGATCGGAAGAGCGTCGTGTA/3SpC3/
DPM_Top_Plate6	Plate6-H11	TGTTGTGA	/5Phos/ATGTTGTGAAGATCGGAAGAGCGTCGTGTA/3SpC3/
DPM_Top_Plate6	Plate6-A12	ACTATAAT	/5Phos/AACTATAATAGATCGGAAGAGCGTCGTGTA/3SpC3/
DPM_Top_Plate6	Plate6-B12	ATTGCTCG	/5Phos/AATTGCTCGAGATCGGAAGAGCGTCGTGTA/3SpC3/
DPM_Top_Plate6	Plate6-C12	CCTGGCAC	/5Phos/ACCTGGCACAGATCGGAAGAGCGTCGTGTA/3SpC3/
DPM_Top_Plate6	Plate6-D12	CTGTACTC	/5Phos/ACTGTACTCAGATCGGAAGAGCGTCGTGTA/3SpC3/
DPM_Top_Plate6	Plate6-E12	GCTCCCTC	/5Phos/AGCTCCCTCAGATCGGAAGAGCGTCGTGTA/3SpC3/
DPM_Top_Plate6	Plate6-F12	GTTTTGGA	/5Phos/AGTTTTGGAAGATCGGAAGAGCGTCGTGTA/3SpC3/
DPM_Top_Plate6	Plate6-G12	TCTTAATT	/5Phos/ATCTTAATTAGATCGGAAGAGCGTCGTGTA/3SpC3/
DPM_Top_Plate6	Plate6-H12	TTGTTCAT	/5Phos/ATTGTTCATAGATCGGAAGAGCGTCGTGTA/3SpC3/
Even_Bottom	Even2Bo1	GATACTGCGGCTGACG	/5Phos/TGACTTGGATACTGCGGCTGACGT
Even_Bottom	Even2Bo2	CGTGACATTAAGGTTG	/5Phos/TGACTTGCGTGACATTAAGGTTGT
Even_Bottom	Even2Bo3	ACCTCACGTCTAGGCG	/5Phos/TGACTTGACCTCACGTCTAGGCGT
Even_Bottom	Even2Bo4	TGATTACGTTCCACGG	/5Phos/TGACTTGTGATTACGTTCCACGGT
Even_Bottom	Even2Bo5	ACTAGGTGGCGGTCTG	/5Phos/TGACTTGACTAGGTGGCGGTCTGT
Even_Bottom	Even2Bo6	ATATCAATGATGGTGC	/5Phos/TGACTTGATATCAATGATGGTGCT
Even_Bottom	Even2Bo7	GATTCCTCTGCGATGC	/5Phos/TGACTTGGATTCCTCTGCGATGCT
Even_Bottom	Even2Bo8	GGTAGCTTACGTCATC	/5Phos/TGACTTGGGTAGCTTACGTCATCT
Even_Bottom	Even2Bo9	TGTAGGTTCTGGAATC	/5Phos/TGACTTGTGTAGGTTCTGGAATCT
Even_Bottom	Even2Bo10	TCAAGCTAGACGGTTC	/5Phos/TGACTTGTCAAGCTAGACGGTTCT
Even_Bottom	Even2Bo11	AAGTCCTGCCACTACG	/5Phos/TGACTTGAAGTCCTGCCACTACGT
Even_Bottom	Even2Bo12	ACCAACAAGATAGTGC	/5Phos/TGACTTGACCAACAAGATAGTGCT
Even_Bottom	Even2Bo13	GAATCACGAGTTCGTC	/5Phos/TGACTTGGAATCACGAGTTCGTCT
Even_Bottom	Even2Bo14	GTAACCATATTGCCGT	/5Phos/TGACTTGGTAACCATATTGCCGTT
Even_Bottom	Even2Bo15	AGAGGATTGGAGAATC	/5Phos/TGACTTGAGAGGATTGGAGAATCT
Even_Bottom	Even2Bo16	CAATGCGTGTGTTCGG	/5Phos/TGACTTGCAATGCGTGTGTTCGGT
Even_Bottom	Even2Bo17	GTGCCGTGACTCCATC	/5Phos/TGACTTGGTGCCGTGACTCCATCT
Even_Bottom	Even2Bo18	TAGAAGTGCTCCAGGT	/5Phos/TGACTTGTAGAAGTGCTCCAGGTT
Even_Bottom	Even2Bo19	GGCTGAGCTGGTCTAG	/5Phos/TGACTTGGGCTGAGCTGGTCTAGT
Even_Bottom	Even2Bo20	CGATTAGTGCGAGAGG	/5Phos/TGACTTGCGATTAGTGCGAGAGGT
Even_Bottom	Even2Bo21	TCCTTCGTTAAGGCTG	/5Phos/TGACTTGTCCTTCGTTAAGGCTGT
Even_Bottom	Even2Bo22	TCGGAGGATCTAGTGG	/5Phos/TGACTTGTCGGAGGATCTAGTGGT
Even_Bottom	Even2Bo23	GGCTTCATTAACTAGG	/5Phos/TGACTTGGGCTTCATTAACTAGGT
Even_Bottom	Even2Bo24	GACGCTCTATACACCG	/5Phos/TGACTTGGACGCTCTATACACCGT
Even_Bottom	Even2Bo25	CGTAGTCCAGGTCGTC	/5Phos/TGACTTGCGTAGTCCAGGTCGTCT
Even_Bottom	Even2Bo26	TGCATAGGACAGGCAG	/5Phos/TGACTTGTGCATAGGACAGGCAGT
Even_Bottom	Even2Bo27	AACTCAAGCACCTCTC	/5Phos/TGACTTGAACTCAAGCACCTCTCT
Even_Bottom	Even2Bo28	GGTATCGTATAGGTCG	/5Phos/TGACTTGGGTATCGTATAGGTCGT
Even_Bottom	Even2Bo29	CGACGACTGACTAGGT	/5Phos/TGACTTGCGACGACTGACTAGGTT
Even_Bottom	Even2Bo30	GTCGCACCACAACCAT	/5Phos/TGACTTGGTCGCACCACAACCATT
Even_Bottom	Even2Bo31	TGGTCGCATGATAAGG	/5Phos/TGACTTGTGGTCGCATGATAAGGT
Even_Bottom	Even2Bo32	ACGCTTGGCTAATAGG	/5Phos/TGACTTGACGCTTGGCTAATAGGT
Even_Bottom	Even2Bo33	AGAAGATCGCAATTAG	/5Phos/TGACTTGAGAAGATCGCAATTAGT
Even_Bottom	Even2Bo34	ACGCTCCTAGATGTTC	/5Phos/TGACTTGACGCTCCTAGATGTTCT
Even_Bottom	Even2Bo35	CGACTACTGCTCACCG	/5Phos/TGACTTGCGACTACTGCTCACCGT
Even_Bottom	Even2Bo36	ATAGATTGTTGCGTGC	/5Phos/TGACTTGATAGATTGTTGCGTGCT
Even_Bottom	Even2Bo37	CTCTACACCGCTGAAG	/5Phos/TGACTTGCTCTACACCGCTGAAGT
Even_Bottom	Even2Bo38	TTCCGTGGCTTACTGG	/5Phos/TGACTTGTTCCGTGGCTTACTGGT
Even_Bottom	Even2Bo39	CGTGAAGTGACTGAGG	/5Phos/TGACTTGCGTGAAGTGACTGAGGT
Even_Bottom	Even2Bo40	ACCGACATCCGCTGTG	/5Phos/TGACTTGACCGACATCCGCTGTGT
Even_Bottom	Even2Bo41	TTCAAGCCTTGCGGAG	/5Phos/TGACTTGTTCAAGCCTTGCGGAGT
Even_Bottom	Even2Bo42	GTTATTGCCACCAGTG	/5Phos/TGACTTGGTTATTGCCACCAGTGT
Even_Bottom	Even2Bo43	GCCAGTTAGCAAGACG	/5Phos/TGACTTGGCCAGTTAGCAAGACGT
Even_Bottom	Even2Bo44	TTGCTCGTTGGTCCAG	/5Phos/TGACTTGTTGCTCGTTGGTCCAGT
Even_Bottom	Even2Bo45	ACCTGCTTCCGTGATG	/5Phos/TGACTTGACCTGCTTCCGTGATGT
Even_Bottom	Even2Bo46	CCACGTTCAACTGGCG	/5Phos/TGACTTGCCACGTTCAACTGGCGT
Even_Bottom	Even2Bo47	CGCTGGAACTCATAAG	/5Phos/TGACTTGCGCTGGAACTCATAAGT
Even_Bottom	Even2Bo48	GAGTCTTCGGATACCG	/5Phos/TGACTTGGAGTCTTCGGATACCGT
Even_Bottom	Even2Bo49	ATGGACCTCTAATTGC	/5Phos/TGACTTGATGGACCTCTAATTGCT
Even_Bottom	Even2Bo50	GGCGGATTCTCAGTGG	/5Phos/TGACTTGGGCGGATTCTCAGTGGT
Even_Bottom	Even2Bo51	TGTTGCTGTGTGGATC	/5Phos/TGACTTGTGTTGCTGTGTGGATCT
Even_Bottom	Even2Bo52	AACCGCAGAGAGGTAG	/5Phos/TGACTTGAACCGCAGAGAGGTAGT
Even_Bottom	Even2Bo53	GCATCGACTCACCTTC	/5Phos/TGACTTGGCATCGACTCACCTTCT
Even_Bottom	Even2Bo54	GGAACACGCACATGGC	/5Phos/TGACTTGGGAACACGCACATGGCT
Even_Bottom	Even2Bo55	GCCAGCAATCCTACAG	/5Phos/TGACTTGGCCAGCAATCCTACAGT
Even_Bottom	Even2Bo56	AACGCTTATGGCAGTG	/5Phos/TGACTTGAACGCTTATGGCAGTGT
Even_Bottom	Even2Bo57	TGTTGCGTAGTGATGC	/5Phos/TGACTTGTGTTGCGTAGTGATGCT
Even_Bottom	Even2Bo58	GGCACGAGATCCTTGC	/5Phos/TGACTTGGGCACGAGATCCTTGCT
Even_Bottom	Even2Bo59	GTCAATGGACGGATGC	/5Phos/TGACTTGGTCAATGGACGGATGCT
Even_Bottom	Even2Bo60	GTCCGTTGCTATAATC	/5Phos/TGACTTGGTCCGTTGCTATAATCT
Even_Bottom	Even2Bo61	CTGATTCCTGAGTCCG	/5Phos/TGACTTGCTGATTCCTGAGTCCGT
Even_Bottom	Even2Bo62	ACTAGCACCTCGTAAT	/5Phos/TGACTTGACTAGCACCTCGTAATT
Even_Bottom	Even2Bo63	GCGTATACCGAGTTGG	/5Phos/TGACTTGGCGTATACCGAGTTGGT
Even_Bottom	Even2Bo64	TGGTTGATTCAAGAAT	/5Phos/TGACTTGTGGTTGATTCAAGAATT
Even_Bottom	Even2Bo65	CGCATGGATACCAGCG	/5Phos/TGACTTGCGCATGGATACCAGCGT
Even_Bottom	Even2Bo66	TTCGTGTGAGTCTCGT	/5Phos/TGACTTGTTCGTGTGAGTCTCGTT
Even_Bottom	Even2Bo67	CATTCTCTGCCGAGAG	/5Phos/TGACTTGCATTCTCTGCCGAGAGT
Even_Bottom	Even2Bo68	GGTTGTTCGTGTGTCG	/5Phos/TGACTTGGGTTGTTCGTGTGTCGT
Even_Bottom	Even2Bo69	AGTCCAGGCATTCGTC	/5Phos/TGACTTGAGTCCAGGCATTCGTCT
Even_Bottom	Even2Bo70	TACAACGGTGCGACTG	/5Phos/TGACTTGTACAACGGTGCGACTGT
Even_Bottom	Even2Bo71	CCGTATCGAGGTGCCG	/5Phos/TGACTTGCCGTATCGAGGTGCCGT
Even_Bottom	Even2Bo72	GGTCCTGTCTAGTCCG	/5Phos/TGACTTGGGTCCTGTCTAGTCCGT
Even_Bottom	Even2Bo73	CGATGACCTGTCCATG	/5Phos/TGACTTGCGATGACCTGTCCATGT
Even_Bottom	Even2Bo74	TGGCTCTGAACCTATC	/5Phos/TGACTTGTGGCTCTGAACCTATCT
Even_Bottom	Even2Bo75	GCACAGTCCTCCATGC	/5Phos/TGACTTGGCACAGTCCTCCATGCT
Even_Bottom	Even2Bo76	GTTGATAAGCCGACGG	/5Phos/TGACTTGGTTGATAAGCCGACGGT
Even_Bottom	Even2Bo77	GAGCGTGCAGTGGAAG	/5Phos/TGACTTGGAGCGTGCAGTGGAAGT
Even_Bottom	Even2Bo78	TGAGCTGGACAGGTGG	/5Phos/TGACTTGTGAGCTGGACAGGTGGT
Even_Bottom	Even2Bo79	TCCGCACTCTGATAAT	/5Phos/TGACTTGTCCGCACTCTGATAATT
Even_Bottom	Even2Bo80	CGCCTATTGTACTGCG	/5Phos/TGACTTGCGCCTATTGTACTGCGT
Even_Bottom	Even2Bo81	GCACACCATCGTATTC	/5Phos/TGACTTGGCACACCATCGTATTCT
Even_Bottom	Even2Bo82	AATGCTTCACACGGTG	/5Phos/TGACTTGAATGCTTCACACGGTGT
Even_Bottom	Even2Bo83	ATGTCCGCCTGCATGG	/5Phos/TGACTTGATGTCCGCCTGCATGGT
Even_Bottom	Even2Bo84	TGGAACACTCTACTGC	/5Phos/TGACTTGTGGAACACTCTACTGCT
Even_Bottom	Even2Bo85	CTATCCTGTCAACGGC	/5Phos/TGACTTGCTATCCTGTCAACGGCT
Even_Bottom	Even2Bo86	AGCTTGCCGTAGCGTG	/5Phos/TGACTTGAGCTTGCCGTAGCGTGT
Even_Bottom	Even2Bo87	TGTCGATATTGATCCG	/5Phos/TGACTTGTGTCGATATTGATCCGT
Even_Bottom	Even2Bo88	GAAGCGGAAGGTATAG	/5Phos/TGACTTGGAAGCGGAAGGTATAGT
Even_Bottom	Even2Bo89	GCTACTTCCGAATCAG	/5Phos/TGACTTGGCTACTTCCGAATCAGT
Even_Bottom	Even2Bo90	CGCACACGATCATCTG	/5Phos/TGACTTGCGCACACGATCATCTGT
Even_Bottom	Even2Bo91	ACTGGTGTCACGTCTC	/5Phos/TGACTTGACTGGTGTCACGTCTCT
Even_Bottom	Even2Bo92	GACTGTTCGACACGTC	/5Phos/TGACTTGGACTGTTCGACACGTCT
Even_Bottom	Even2Bo93	ACCACGGAGCCTTCTC	/5Phos/TGACTTGACCACGGAGCCTTCTCT
Even_Bottom	Even2Bo94	CCTGTTACGTCCGCTG	/5Phos/TGACTTGCCTGTTACGTCCGCTGT
Even_Bottom	Even2Bo95	GACGCTGTGGCGATTC	/5Phos/TGACTTGGACGCTGTGGCGATTCT
Even_Bottom	Even2Bo96	CGCTCCAGTCGTAATC	/5Phos/TGACTTGCGCTCCAGTCGTAATCT
Even_Top	Even2Top1		/5Phos/AGTTGTCACGTCAGCCGCAGTATC
Even_Top	Even2Top2		/5Phos/AGTTGTCACAACCTTAATGTCACG
Even_Top	Even2Top3		/5Phos/AGTTGTCACGCCTAGACGTGAGGT
Even_Top	Even2Top4		/5Phos/AGTTGTCACCGTGGAACGTAATCA
Even_Top	Even2Top5		/5Phos/AGTTGTCACAGACCGCCACCTAGT
Even_Top	Even2Top6		/5Phos/AGTTGTCAGCACCATCATTGATAT
Even_Top	Even2Top7		/5Phos/AGTTGTCAGCATCGCAGAGGAATC
Even_Top	Even2Top8		/5Phos/AGTTGTCAGATGACGTAAGCTACC
Even_Top	Even2Top9		/5Phos/AGTTGTCAGATTCCAGAACCTACA
Even_Top	Even2Top10		/5Phos/AGTTGTCAGAACCGTCTAGCTTGA
Even_Top	Even2Top11		/5Phos/AGTTGTCACGTAGTGGCAGGACTT
Even_Top	Even2Top12		/5Phos/AGTTGTCAGCACTATCTTGTTGGT
Even_Top	Even2Top13		/5Phos/AGTTGTCAGACGAACTCGTGATTC
Even_Top	Even2Top14		/5Phos/AGTTGTCAACGGCAATATGGTTAC
Even_Top	Even2Top15		/5Phos/AGTTGTCAGATTCTCCAATCCTCT
Even_Top	Even2Top16		/5Phos/AGTTGTCACCGAACACACGCATTG
Even_Top	Even2Top17		/5Phos/AGTTGTCAGATGGAGTCACGGCAC
Even_Top	Even2Top18		/5Phos/AGTTGTCAACCTGGAGCACTTCTA
Even_Top	Even2Top19		/5Phos/AGTTGTCACTAGACCAGCTCAGCC
Even_Top	Even2Top20		/5Phos/AGTTGTCACCTCTCGCACTAATCG
Even_Top	Even2Top21		/5Phos/AGTTGTCACAGCCTTAACGAAGGA
Even_Top	Even2Top22		/5Phos/AGTTGTCACCACTAGATCCTCCGA
Even_Top	Even2Top23		/5Phos/AGTTGTCACCTAGTTAATGAAGCC
Even_Top	Even2Top24		/5Phos/AGTTGTCACGGTGTATAGAGCGTC
Even_Top	Even2Top25		/5Phos/AGTTGTCAGACGACCTGGACTACG
Even_Top	Even2Top26		/5Phos/AGTTGTCACTGCCTGTCCTATGCA
Even_Top	Even2Top27		/5Phos/AGTTGTCAGAGAGGTGCTTGAGTT
Even_Top	Even2Top28		/5Phos/AGTTGTCACGACCTATACGATACC
Even_Top	Even2Top29		/5Phos/AGTTGTCAACCTAGTCAGTCGTCG
Even_Top	Even2Top30		/5Phos/AGTTGTCAATGGTTGTGGTGCGAC
Even_Top	Even2Top31		/5Phos/AGTTGTCACCTTATCATGCGACCA
Even_Top	Even2Top32		/5Phos/AGTTGTCACCTATTAGCCAAGCGT
Even_Top	Even2Top33		/5Phos/AGTTGTCACTAATTGCGATCTTCT
Even_Top	Even2Top34		/5Phos/AGTTGTCAGAACATCTAGGAGCGT
Even_Top	Even2Top35		/5Phos/AGTTGTCACGGTGAGCAGTAGTCG
Even_Top	Even2Top36		/5Phos/AGTTGTCAGCACGCAACAATCTAT
Even_Top	Even2Top37		/5Phos/AGTTGTCACTTCAGCGGTGTAGAG
Even_Top	Even2Top38		/5Phos/AGTTGTCACCAGTAAGCCACGGAA
Even_Top	Even2Top39		/5Phos/AGTTGTCACCTCAGTCACTTCACG
Even_Top	Even2Top40		/5Phos/AGTTGTCACACAGCGGATGTCGGT
Even_Top	Even2Top41		/5Phos/AGTTGTCACTCCGCAAGGCTTGAA
Even_Top	Even2Top42		/5Phos/AGTTGTCACACTGGTGGCAATAAC
Even_Top	Even2Top43		/5Phos/AGTTGTCACGTCTTGCTAACTGGC
Even_Top	Even2Top44		/5Phos/AGTTGTCACTGGACCAACGAGCAA
Even_Top	Even2Top45		/5Phos/AGTTGTCACATCACGGAAGCAGGT
Even_Top	Even2Top46		/5Phos/AGTTGTCACGCCAGTTGAACGTGG
Even_Top	Even2Top47		/5Phos/AGTTGTCACTTATGAGTTCCAGCG
Even_Top	Even2Top48		/5Phos/AGTTGTCACGGTATCCGAAGACTC
Even_Top	Even2Top49		/5Phos/AGTTGTCAGCAATTAGAGGTCCAT
Even_Top	Even2Top50		/5Phos/AGTTGTCACCACTGAGAATCCGCC
Even_Top	Even2Top51		/5Phos/AGTTGTCAGATCCACACAGCAACA
Even_Top	Even2Top52		/5Phos/AGTTGTCACTACCTCTCTGCGGTT
Even_Top	Even2Top53		/5Phos/AGTTGTCAGAAGGTGAGTCGATGC
Even_Top	Even2Top54		/5Phos/AGTTGTCAGCCATGTGCGTGTTCC
Even_Top	Even2Top55		/5Phos/AGTTGTCACTGTAGGATTGCTGGC
Even_Top	Even2Top56		/5Phos/AGTTGTCACACTGCCATAAGCGTT
Even_Top	Even2Top57		/5Phos/AGTTGTCAGCATCACTACGCAACA
Even_Top	Even2Top58		/5Phos/AGTTGTCAGCAAGGATCTCGTGCC
Even_Top	Even2Top59		/5Phos/AGTTGTCAGCATCCGTCCATTGAC
Even_Top	Even2Top60		/5Phos/AGTTGTCAGATTATAGCAACGGAC
Even_Top	Even2Top61		/5Phos/AGTTGTCACGGACTCAGGAATCAG
Even_Top	Even2Top62		/5Phos/AGTTGTCAATTACGAGGTGCTAGT
Even_Top	Even2Top63		/5Phos/AGTTGTCACCAACTCGGTATACGC
Even_Top	Even2Top64		/5Phos/AGTTGTCAATTCTTGAATCAACCA
Even_Top	Even2Top65		/5Phos/AGTTGTCACGCTGGTATCCATGCG
Even_Top	Even2Top66		/5Phos/AGTTGTCAACGAGACTCACACGAA
Even_Top	Even2Top67		/5Phos/AGTTGTCACTCTCGGCAGAGAATG
Even_Top	Even2Top68		/5Phos/AGTTGTCACGACACACGAACAACC
Even_Top	Even2Top69		/5Phos/AGTTGTCAGACGAATGCCTGGACT
Even_Top	Even2Top70		/5Phos/AGTTGTCACAGTCGCACCGTTGTA
Even_Top	Even2Top71		/5Phos/AGTTGTCACGGCACCTCGATACGG
Even_Top	Even2Top72		/5Phos/AGTTGTCACGGACTAGACAGGACC
Even_Top	Even2Top73		/5Phos/AGTTGTCACATGGACAGGTCATCG
Even_Top	Even2Top74		/5Phos/AGTTGTCAGATAGGTTCAGAGCCA
Even_Top	Even2Top75		/5Phos/AGTTGTCAGCATGGAGGACTGTGC
Even_Top	Even2Top76		/5Phos/AGTTGTCACCGTCGGCTTATCAAC
Even_Top	Even2Top77		/5Phos/AGTTGTCACTTCCACTGCACGCTC
Even_Top	Even2Top78		/5Phos/AGTTGTCACCACCTGTCCAGCTCA
Even_Top	Even2Top79		/5Phos/AGTTGTCAATTATCAGAGTGCGGA
Even_Top	Even2Top80		/5Phos/AGTTGTCACGCAGTACAATAGGCG
Even_Top	Even2Top81		/5Phos/AGTTGTCAGAATACGATGGTGTGC
Even_Top	Even2Top82		/5Phos/AGTTGTCACACCGTGTGAAGCATT
Even_Top	Even2Top83		/5Phos/AGTTGTCACCATGCAGGCGGACAT
Even_Top	Even2Top84		/5Phos/AGTTGTCAGCAGTAGAGTGTTCCA
Even_Top	Even2Top85		/5Phos/AGTTGTCAGCCGTTGACAGGATAG
Even_Top	Even2Top86		/5Phos/AGTTGTCACACGCTACGGCAAGCT
Even_Top	Even2Top87		/5Phos/AGTTGTCACGGATCAATATCGACA
Even_Top	Even2Top88		/5Phos/AGTTGTCACTATACCTTCCGCTTC
Even_Top	Even2Top89		/5Phos/AGTTGTCACTGATTCGGAAGTAGC
Even_Top	Even2Top90		/5Phos/AGTTGTCACAGATGATCGTGTGCG
Even_Top	Even2Top91		/5Phos/AGTTGTCAGAGACGTGACACCAGT
Even_Top	Even2Top92		/5Phos/AGTTGTCAGACGTGTCGAACAGTC
Even_Top	Even2Top93		/5Phos/AGTTGTCAGAGAAGGCTCCGTGGT
Even_Top	Even2Top94		/5Phos/AGTTGTCACAGCGGACGTAACAGG
Even_Top	Even2Top95		/5Phos/AGTTGTCAGAATCGCCACAGCGTC
Even_Top	Even2Top96		/5Phos/AGTTGTCAGATTACGACTGGAGCG
IndexedPrimersBARCODES_I96	2P_57	AAGTAGAG	CAAGCAGAAGACGGCATACGAGATCTCTACTTGTGACTGGAGTTCAGACGTGTGCTCTTCCGATCT
IndexedPrimersBARCODES_I96	2P_100	ACACGATC	CAAGCAGAAGACGGCATACGAGATGATCGTGTGTGACTGGAGTTCAGACGTGTGCTCTTCCGATCT
IndexedPrimersBARCODES_I96	2P_930	TGTTCCGA	CAAGCAGAAGACGGCATACGAGATTCGGAACAGTGACTGGAGTTCAGACGTGTGCTCTTCCGATCT
IndexedPrimersBARCODES_I96	2P_373	CATGATCG	CAAGCAGAAGACGGCATACGAGATCGATCATGGTGACTGGAGTTCAGACGTGTGCTCTTCCGATCT
IndexedPrimersBARCODES_I96	2P_498	CGTTACCA	CAAGCAGAAGACGGCATACGAGATTGGTAACGGTGACTGGAGTTCAGACGTGTGCTCTTCCGATCT
IndexedPrimersBARCODES_I96	2P_861	TCCTTGGT	CAAGCAGAAGACGGCATACGAGATACCAAGGAGTGACTGGAGTTCAGACGTGTGCTCTTCCGATCT
IndexedPrimersBARCODES_I96	2P_23	AACGCATT	CAAGCAGAAGACGGCATACGAGATAATGCGTTGTGACTGGAGTTCAGACGTGTGCTCTTCCGATCT
IndexedPrimersBARCODES_I96	2P_109	ACAGGTAT	CAAGCAGAAGACGGCATACGAGATATACCTGTGTGACTGGAGTTCAGACGTGTGCTCTTCCGATCT
IndexedPrimersBARCODES_I96	2P_218	AGGTAAGG	CAAGCAGAAGACGGCATACGAGATCCTTACCTGTGACTGGAGTTCAGACGTGTGCTCTTCCGATCT
IndexedPrimersBARCODES_I96	2Ped_3	AACAATGG	CAAGCAGAAGACGGCATACGAGATCCATTGTTGTGACTGGAGTTCAGACGTGTGCTCTTCCGATCT
IndexedPrimersBARCODES_I96	2P_163	ACTGTATC	CAAGCAGAAGACGGCATACGAGATGATACAGTGTGACTGGAGTTCAGACGTGTGCTCTTCCGATCT
IndexedPrimersBARCODES_I96	2P_220	AGGTCGCA	CAAGCAGAAGACGGCATACGAGATTGCGACCTGTGACTGGAGTTCAGACGTGTGCTCTTCCGATCT
IndexedPrimersBARCODES_I96	2P_726	GGTCCAGA	CAAGCAGAAGACGGCATACGAGATTCTGGACCGTGACTGGAGTTCAGACGTGTGCTCTTCCGATCT
IndexedPrimersBARCODES_I96	2P_375	CATGCTTA	CAAGCAGAAGACGGCATACGAGATTAAGCATGGTGACTGGAGTTCAGACGTGTGCTCTTCCGATCT
IndexedPrimersBARCODES_I96	2P_214	AGGATCTA	CAAGCAGAAGACGGCATACGAGATTAGATCCTGTGACTGGAGTTCAGACGTGTGCTCTTCCGATCT
IndexedPrimersBARCODES_I96	2P_880	TCTGGCGA	CAAGCAGAAGACGGCATACGAGATTCGCCAGAGTGACTGGAGTTCAGACGTGTGCTCTTCCGATCT
IndexedPrimersBARCODES_I96	2P_223	AGGTTATC	CAAGCAGAAGACGGCATACGAGATGATAACCTGTGACTGGAGTTCAGACGTGTGCTCTTCCGATCT
IndexedPrimersBARCODES_I96	2P_754	GTCTGATG	CAAGCAGAAGACGGCATACGAGATCATCAGACGTGACTGGAGTTCAGACGTGTGCTCTTCCGATCT
IndexedPrimersBARCODES_I96	2P_379	CCAACATT	CAAGCAGAAGACGGCATACGAGATAATGTTGGGTGACTGGAGTTCAGACGTGTGCTCTTCCGATCT
IndexedPrimersBARCODES_I96	2P_309	CAACTCTC	CAAGCAGAAGACGGCATACGAGATGAGAGTTGGTGACTGGAGTTCAGACGTGTGCTCTTCCGATCT
IndexedPrimersBARCODES_I96	2P_291	ATTCCTCT	CAAGCAGAAGACGGCATACGAGATAGAGGAATGTGACTGGAGTTCAGACGTGTGCTCTTCCGATCT
IndexedPrimersBARCODES_I96	2P_500	CTAACTCG	CAAGCAGAAGACGGCATACGAGATCGAGTTAGGTGACTGGAGTTCAGACGTGTGCTCTTCCGATCT
IndexedPrimersBARCODES_I96	2P_534	CTGCGGAT	CAAGCAGAAGACGGCATACGAGATATCCGCAGGTGACTGGAGTTCAGACGTGTGCTCTTCCGATCT
IndexedPrimersBARCODES_I96	2P_504	CTACCAGG	CAAGCAGAAGACGGCATACGAGATCCTGGTAGGTGACTGGAGTTCAGACGTGTGCTCTTCCGATCT
IndexedPrimersBARCODES_I96	2P_630	GCACATCT	CAAGCAGAAGACGGCATACGAGATAGATGTGCGTGACTGGAGTTCAGACGTGTGCTCTTCCGATCT
IndexedPrimersBARCODES_I96	2P_741	GTATAACA	CAAGCAGAAGACGGCATACGAGATTGTTATACGTGACTGGAGTTCAGACGTGTGCTCTTCCGATCT
IndexedPrimersBARCODES_I96	2P_367	CATAGCGA	CAAGCAGAAGACGGCATACGAGATTCGCTATGGTGACTGGAGTTCAGACGTGTGCTCTTCCGATCT
IndexedPrimersBARCODES_I96	2P_579	GACAGTAA	CAAGCAGAAGACGGCATACGAGATTTACTGTCGTGACTGGAGTTCAGACGTGTGCTCTTCCGATCT
IndexedPrimersBARCODES_I96	2P_938	TTACGCAC	CAAGCAGAAGACGGCATACGAGATGTGCGTAAGTGACTGGAGTTCAGACGTGTGCTCTTCCGATCT
IndexedPrimersBARCODES_I96	2P_745	GTCATCTA	CAAGCAGAAGACGGCATACGAGATTAGATGACGTGACTGGAGTTCAGACGTGTGCTCTTCCGATCT
IndexedPrimersBARCODES_I96	2P_542	CTGTAATC	CAAGCAGAAGACGGCATACGAGATGATTACAGGTGACTGGAGTTCAGACGTGTGCTCTTCCGATCT
IndexedPrimersBARCODES_I96	2P_655	GCCGTCGA	CAAGCAGAAGACGGCATACGAGATTCGACGGCGTGACTGGAGTTCAGACGTGTGCTCTTCCGATCT
IndexedPrimersBARCODES_I96	2P_732	GTAACATC	CAAGCAGAAGACGGCATACGAGATGATGTTACGTGACTGGAGTTCAGACGTGTGCTCTTCCGATCT
IndexedPrimersBARCODES_I96	2P_567	GAAGGAAG	CAAGCAGAAGACGGCATACGAGATCTTCCTTCGTGACTGGAGTTCAGACGTGTGCTCTTCCGATCT
IndexedPrimersBARCODES_I96	2P_584	GACCTAAC	CAAGCAGAAGACGGCATACGAGATGTTAGGTCGTGACTGGAGTTCAGACGTGTGCTCTTCCGATCT
IndexedPrimersBARCODES_I96	2P_117	ACCAACTG	CAAGCAGAAGACGGCATACGAGATCAGTTGGTGTGACTGGAGTTCAGACGTGTGCTCTTCCGATCT
IndexedPrimersBARCODES_I96	2P_954	TTCGCTGA	CAAGCAGAAGACGGCATACGAGATTCAGCGAAGTGACTGGAGTTCAGACGTGTGCTCTTCCGATCT
IndexedPrimersBARCODES_I96	2P_908	TGCTCGAC	CAAGCAGAAGACGGCATACGAGATGTCGAGCAGTGACTGGAGTTCAGACGTGTGCTCTTCCGATCT
IndexedPrimersBARCODES_I96	2P_426	CCTATGCC	CAAGCAGAAGACGGCATACGAGATGGCATAGGGTGACTGGAGTTCAGACGTGTGCTCTTCCGATCT
IndexedPrimersBARCODES_I96	2P_357	CAGGAGCC	CAAGCAGAAGACGGCATACGAGATGGCTCCTGGTGACTGGAGTTCAGACGTGTGCTCTTCCGATCT
IndexedPrimersBARCODES_I96	2P_438	CCTTCGCA	CAAGCAGAAGACGGCATACGAGATTGCGAAGGGTGACTGGAGTTCAGACGTGTGCTCTTCCGATCT
IndexedPrimersBARCODES_I96	2P_959	TTGAATAG	CAAGCAGAAGACGGCATACGAGATCTATTCAAGTGACTGGAGTTCAGACGTGTGCTCTTCCGATCT
IndexedPrimersBARCODES_I96	2P_821	TATCTGCC	CAAGCAGAAGACGGCATACGAGATGGCAGATAGTGACTGGAGTTCAGACGTGTGCTCTTCCGATCT
IndexedPrimersBARCODES_I96	2P_778	TAAGCACA	CAAGCAGAAGACGGCATACGAGATTGTGCTTAGTGACTGGAGTTCAGACGTGTGCTCTTCCGATCT
IndexedPrimersBARCODES_I96	2P_868	TCGCTAGA	CAAGCAGAAGACGGCATACGAGATTCTAGCGAGTGACTGGAGTTCAGACGTGTGCTCTTCCGATCT
IndexedPrimersBARCODES_I96	2P_924	TGTAATCA	CAAGCAGAAGACGGCATACGAGATTGATTACAGTGACTGGAGTTCAGACGTGTGCTCTTCCGATCT
IndexedPrimersBARCODES_I96	2P_934	TTAATCAG	CAAGCAGAAGACGGCATACGAGATCTGATTAAGTGACTGGAGTTCAGACGTGTGCTCTTCCGATCT
IndexedPrimersBARCODES_I96	2P_899	TGCAAGTA	CAAGCAGAAGACGGCATACGAGATTACTTGCAGTGACTGGAGTTCAGACGTGTGCTCTTCCGATCT
IndexedPrimersBARCODES_I96	2P_190	AGCAATTC	CAAGCAGAAGACGGCATACGAGATGAATTGCTGTGACTGGAGTTCAGACGTGTGCTCTTCCGATCT
IndexedPrimersBARCODES_I96	2P_34	AACTTGAC	CAAGCAGAAGACGGCATACGAGATGTCAAGTTGTGACTGGAGTTCAGACGTGTGCTCTTCCGATCT
IndexedPrimersBARCODES_I96	2P_927	TGTCGGAT	CAAGCAGAAGACGGCATACGAGATATCCGACAGTGACTGGAGTTCAGACGTGTGCTCTTCCGATCT
IndexedPrimersBARCODES_I96	2P_866	TCGCCTTG	CAAGCAGAAGACGGCATACGAGATCAAGGCGAGTGACTGGAGTTCAGACGTGTGCTCTTCCGATCT
IndexedPrimersBARCODES_I96	2P_38	AAGACACT	CAAGCAGAAGACGGCATACGAGATAGTGTCTTGTGACTGGAGTTCAGACGTGTGCTCTTCCGATCT
IndexedPrimersBARCODES_I96	2P_875	TCTCGGTC	CAAGCAGAAGACGGCATACGAGATGACCGAGAGTGACTGGAGTTCAGACGTGTGCTCTTCCGATCT
IndexedPrimersBARCODES_I96	2P_78	AATGTTCT	CAAGCAGAAGACGGCATACGAGATAGAACATTGTGACTGGAGTTCAGACGTGTGCTCTTCCGATCT
IndexedPrimersBARCODES_I96	2P_151	ACTAAGAC	CAAGCAGAAGACGGCATACGAGATGTCTTAGTGTGACTGGAGTTCAGACGTGTGCTCTTCCGATCT
IndexedPrimersBARCODES_I96	2P_288	ATTATCAA	CAAGCAGAAGACGGCATACGAGATTTGATAATGTGACTGGAGTTCAGACGTGTGCTCTTCCGATCT
IndexedPrimersBARCODES_I96	2P_110	ACAGTTGA	CAAGCAGAAGACGGCATACGAGATTCAACTGTGTGACTGGAGTTCAGACGTGTGCTCTTCCGATCT
IndexedPrimersBARCODES_I96	2P_195	AGCATGGA	CAAGCAGAAGACGGCATACGAGATTCCATGCTGTGACTGGAGTTCAGACGTGTGCTCTTCCGATCT
IndexedPrimersBARCODES_I96	2P_222	AGGTGCGA	CAAGCAGAAGACGGCATACGAGATTCGCACCTGTGACTGGAGTTCAGACGTGTGCTCTTCCGATCT
IndexedPrimersBARCODES_I96	2P_332	CACATCCT	CAAGCAGAAGACGGCATACGAGATAGGATGTGGTGACTGGAGTTCAGACGTGTGCTCTTCCGATCT
IndexedPrimersBARCODES_I96	2P_236	AGTTGCTT	CAAGCAGAAGACGGCATACGAGATAAGCAACTGTGACTGGAGTTCAGACGTGTGCTCTTCCGATCT
IndexedPrimersBARCODES_I96	2P_250	ATAGCGTC	CAAGCAGAAGACGGCATACGAGATGACGCTATGTGACTGGAGTTCAGACGTGTGCTCTTCCGATCT
IndexedPrimersBARCODES_I96	2P_289	ATTATGTT	CAAGCAGAAGACGGCATACGAGATAACATAATGTGACTGGAGTTCAGACGTGTGCTCTTCCGATCT
IndexedPrimersBARCODES_I96	2P_298	ATTGTCTG	CAAGCAGAAGACGGCATACGAGATCAGACAATGTGACTGGAGTTCAGACGTGTGCTCTTCCGATCT
IndexedPrimersBARCODES_I96	2P_352	CAGCAAGG	CAAGCAGAAGACGGCATACGAGATCCTTGCTGGTGACTGGAGTTCAGACGTGTGCTCTTCCGATCT
IndexedPrimersBARCODES_I96	2P_469	CGCCTTCC	CAAGCAGAAGACGGCATACGAGATGGAAGGCGGTGACTGGAGTTCAGACGTGTGCTCTTCCGATCT
IndexedPrimersBARCODES_I96	2P_355	CAGCGGTA	CAAGCAGAAGACGGCATACGAGATTACCGCTGGTGACTGGAGTTCAGACGTGTGCTCTTCCGATCT
IndexedPrimersBARCODES_I96	2P_320	CAATAGTC	CAAGCAGAAGACGGCATACGAGATGACTATTGGTGACTGGAGTTCAGACGTGTGCTCTTCCGATCT
IndexedPrimersBARCODES_I96	2P_509	CTATGCGT	CAAGCAGAAGACGGCATACGAGATACGCATAGGTGACTGGAGTTCAGACGTGTGCTCTTCCGATCT
IndexedPrimersBARCODES_I96	2P_544	CTGTGGCG	CAAGCAGAAGACGGCATACGAGATCGCCACAGGTGACTGGAGTTCAGACGTGTGCTCTTCCGATCT
IndexedPrimersBARCODES_I96	2P_474	CGCTATGT	CAAGCAGAAGACGGCATACGAGATACATAGCGGTGACTGGAGTTCAGACGTGTGCTCTTCCGATCT
IndexedPrimersBARCODES_I96	2P_393	CCAGTTAG	CAAGCAGAAGACGGCATACGAGATCTAACTGGGTGACTGGAGTTCAGACGTGTGCTCTTCCGATCT
IndexedPrimersBARCODES_I96	2P_869	TCGGAATG	CAAGCAGAAGACGGCATACGAGATCATTCCGAGTGACTGGAGTTCAGACGTGTGCTCTTCCGATCT
IndexedPrimersBARCODES_I96	2P_422	CCTACCAT	CAAGCAGAAGACGGCATACGAGATATGGTAGGGTGACTGGAGTTCAGACGTGTGCTCTTCCGATCT
IndexedPrimersBARCODES_I96	2P_564	GAAGAAGT	CAAGCAGAAGACGGCATACGAGATACTTCTTCGTGACTGGAGTTCAGACGTGTGCTCTTCCGATCT
IndexedPrimersBARCODES_I96	2P_851	TCCAGCAA	CAAGCAGAAGACGGCATACGAGATTTGCTGGAGTGACTGGAGTTCAGACGTGTGCTCTTCCGATCT
IndexedPrimersBARCODES_I96	2P_559	GAACCTAG	CAAGCAGAAGACGGCATACGAGATCTAGGTTCGTGACTGGAGTTCAGACGTGTGCTCTTCCGATCT
IndexedPrimersBARCODES_I96	2P_581	GACCAGGA	CAAGCAGAAGACGGCATACGAGATTCCTGGTCGTGACTGGAGTTCAGACGTGTGCTCTTCCGATCT
IndexedPrimersBARCODES_I96	2P_657	GCCTAGCC	CAAGCAGAAGACGGCATACGAGATGGCTAGGCGTGACTGGAGTTCAGACGTGTGCTCTTCCGATCT
IndexedPrimersBARCODES_I96	2P_747	GTCCACAG	CAAGCAGAAGACGGCATACGAGATCTGTGGACGTGACTGGAGTTCAGACGTGTGCTCTTCCGATCT
IndexedPrimersBARCODES_I96	2P_583	GACCGTTG	CAAGCAGAAGACGGCATACGAGATCAACGGTCGTGACTGGAGTTCAGACGTGTGCTCTTCCGATCT
IndexedPrimersBARCODES_I96	2P_616	GATATCCA	CAAGCAGAAGACGGCATACGAGATTGGATATCGTGACTGGAGTTCAGACGTGTGCTCTTCCGATCT
IndexedPrimersBARCODES_I96	2P_652	GCCGCAAC	CAAGCAGAAGACGGCATACGAGATGTTGCGGCGTGACTGGAGTTCAGACGTGTGCTCTTCCGATCT
IndexedPrimersBARCODES_I96	2P_52	AAGGATGT	CAAGCAGAAGACGGCATACGAGATACATCCTTGTGACTGGAGTTCAGACGTGTGCTCTTCCGATCT
IndexedPrimersBARCODES_I96	2P_960	TTGAGCCT	CAAGCAGAAGACGGCATACGAGATAGGCTCAAGTGACTGGAGTTCAGACGTGTGCTCTTCCGATCT
IndexedPrimersBARCODES_I96	2P_293	ATTCTAGG	CAAGCAGAAGACGGCATACGAGATCCTAGAATGTGACTGGAGTTCAGACGTGTGCTCTTCCGATCT
IndexedPrimersBARCODES_I96	2P_800	TACTTAGC	CAAGCAGAAGACGGCATACGAGATGCTAAGTAGTGACTGGAGTTCAGACGTGTGCTCTTCCGATCT
IndexedPrimersBARCODES_I96	2P_786	TAATGAAC	CAAGCAGAAGACGGCATACGAGATGTTCATTAGTGACTGGAGTTCAGACGTGTGCTCTTCCGATCT
IndexedPrimersBARCODES_I96	2P_388	CCAGAGCT	CAAGCAGAAGACGGCATACGAGATAGCTCTGGGTGACTGGAGTTCAGACGTGTGCTCTTCCGATCT
IndexedPrimersBARCODES_I96	2P_910	TGCTGCTG	CAAGCAGAAGACGGCATACGAGATCAGCAGCAGTGACTGGAGTTCAGACGTGTGCTCTTCCGATCT
IndexedPrimersBARCODES_I96	2P_818	TATCCAGG	CAAGCAGAAGACGGCATACGAGATCCTGGATAGTGACTGGAGTTCAGACGTGTGCTCTTCCGATCT
IndexedPrimersBARCODES_I96	2P_878	TCTGCAAG	CAAGCAGAAGACGGCATACGAGATCTTGCAGAGTGACTGGAGTTCAGACGTGTGCTCTTCCGATCT
IndexedPrimersBARCODES_I96	2P_968	TTGTCTAT	CAAGCAGAAGACGGCATACGAGATATAGACAAGTGACTGGAGTTCAGACGTGTGCTCTTCCGATCT
IndexedPrimersBARCODES_I96	2P_944	TTATATCT	CAAGCAGAAGACGGCATACGAGATAGATATAAGTGACTGGAGTTCAGACGTGTGCTCTTCCGATCT
IndexedPrimersBARCODES_I96	2P_923	TGTAACTC	CAAGCAGAAGACGGCATACGAGATGAGTTACAGTGACTGGAGTTCAGACGTGTGCTCTTCCGATCT
Odd_Bottom	Odd2Bo1	CTTCGTGGAATCTAGC	/5Phos/GACAACTCTTCGTGGAATCTAGCT
Odd_Bottom	Odd2Bo2	GCCTACAGAAGTATCT	/5Phos/GACAACTGCCTACAGAAGTATCTT
Odd_Bottom	Odd2Bo3	GGTATTACTCATAGGC	/5Phos/GACAACTGGTATTACTCATAGGCT
Odd_Bottom	Odd2Bo4	AGACAAGCCACCTTAT	/5Phos/GACAACTAGACAAGCCACCTTATT
Odd_Bottom	Odd2Bo5	GCCTCTAACTAAGGAT	/5Phos/GACAACTGCCTCTAACTAAGGATT
Odd_Bottom	Odd2Bo6	GGTGTCAAGCACCGCT	/5Phos/GACAACTGGTGTCAAGCACCGCTT
Odd_Bottom	Odd2Bo7	CACCGCAATATAATTG	/5Phos/GACAACTCACCGCAATATAATTGT
Odd_Bottom	Odd2Bo8	GCTGTGTCTGTCACCT	/5Phos/GACAACTGCTGTGTCTGTCACCTT
Odd_Bottom	Odd2Bo9	TCCTGTGCGTTAGAGT	/5Phos/GACAACTTCCTGTGCGTTAGAGTT
Odd_Bottom	Odd2Bo10	GTCGGCAACAGACCAT	/5Phos/GACAACTGTCGGCAACAGACCATT
Odd_Bottom	Odd2Bo11	GCGGTCACGCCTGAGC	/5Phos/GACAACTGCGGTCACGCCTGAGCT
Odd_Bottom	Odd2Bo12	CGCCGTGCCTCTAACT	/5Phos/GACAACTCGCCGTGCCTCTAACTT
Odd_Bottom	Odd2Bo13	TATCAATCGCAGCGGT	/5Phos/GACAACTTATCAATCGCAGCGGTT
Odd_Bottom	Odd2Bo14	ACTAGGTCGAATGCCT	/5Phos/GACAACTACTAGGTCGAATGCCTT
Odd_Bottom	Odd2Bo15	AATCAATGAACGAGGC	/5Phos/GACAACTAATCAATGAACGAGGCT
Odd_Bottom	Odd2Bo16	TTGGCTAGGTTGTGTG	/5Phos/GACAACTTTGGCTAGGTTGTGTGT
Odd_Bottom	Odd2Bo17	CACTAGAGGTGTCCGT	/5Phos/GACAACTCACTAGAGGTGTCCGTT
Odd_Bottom	Odd2Bo18	CGTGCTATAATCTTGT	/5Phos/GACAACTCGTGCTATAATCTTGTT
Odd_Bottom	Odd2Bo19	TTCGAGTGGAGCAATT	/5Phos/GACAACTTTCGAGTGGAGCAATTT
Odd_Bottom	Odd2Bo20	TGGTTGCTTGCATTGT	/5Phos/GACAACTTGGTTGCTTGCATTGTT
Odd_Bottom	Odd2Bo21	CGCCATGCAGTTACGC	/5Phos/GACAACTCGCCATGCAGTTACGCT
Odd_Bottom	Odd2Bo22	TAGTTCGTCACCGTGT	/5Phos/GACAACTTAGTTCGTCACCGTGTT
Odd_Bottom	Odd2Bo23	AGCGTCATCGGACTCT	/5Phos/GACAACTAGCGTCATCGGACTCTT
Odd_Bottom	Odd2Bo24	TCGGTTCGTTAGGCGT	/5Phos/GACAACTTCGGTTCGTTAGGCGTT
Odd_Bottom	Odd2Bo25	ATACTCGGTTAGTCCT	/5Phos/GACAACTATACTCGGTTAGTCCTT
Odd_Bottom	Odd2Bo26	AGTAGAACGCTAGGTT	/5Phos/GACAACTAGTAGAACGCTAGGTTT
Odd_Bottom	Odd2Bo27	TCCGCCTAGTGAGGCT	/5Phos/GACAACTTCCGCCTAGTGAGGCTT
Odd_Bottom	Odd2Bo28	CAGCAACGTCCTATTG	/5Phos/GACAACTCAGCAACGTCCTATTGT
Odd_Bottom	Odd2Bo29	GTGCCTACGACGTAGC	/5Phos/GACAACTGTGCCTACGACGTAGCT
Odd_Bottom	Odd2Bo30	CGTCACACGTTGAACT	/5Phos/GACAACTCGTCACACGTTGAACTT
Odd_Bottom	Odd2Bo31	AAGGACGCAGTGAGAT	/5Phos/GACAACTAAGGACGCAGTGAGATT
Odd_Bottom	Odd2Bo32	TATACGGCACCTACTT	/5Phos/GACAACTTATACGGCACCTACTTT
Odd_Bottom	Odd2Bo33	ATCGTTCTCATTCTGT	/5Phos/GACAACTATCGTTCTCATTCTGTT
Odd_Bottom	Odd2Bo34	CATCATACCACGCCGC	/5Phos/GACAACTCATCATACCACGCCGCT
Odd_Bottom	Odd2Bo35	ATGATGTGATAAGGCT	/5Phos/GACAACTATGATGTGATAAGGCTT
Odd_Bottom	Odd2Bo36	TGGTTGCAGCCTCCGC	/5Phos/GACAACTTGGTTGCAGCCTCCGCT
Odd_Bottom	Odd2Bo37	TACAATCACCGTGTAT	/5Phos/GACAACTTACAATCACCGTGTATT
Odd_Bottom	Odd2Bo38	CATACTCTGGTGCCAT	/5Phos/GACAACTCATACTCTGGTGCCATT
Odd_Bottom	Odd2Bo39	GTTGAACACTTCCGTT	/5Phos/GACAACTGTTGAACACTTCCGTTT
Odd_Bottom	Odd2Bo40	TCACACGTCGAGCGAT	/5Phos/GACAACTTCACACGTCGAGCGATT
Odd_Bottom	Odd2Bo41	AACGCCGATAAGGACT	/5Phos/GACAACTAACGCCGATAAGGACTT
Odd_Bottom	Odd2Bo42	ATCCTGGACAGTGAGC	/5Phos/GACAACTATCCTGGACAGTGAGCT
Odd_Bottom	Odd2Bo43	CTTCTTGTCTTGGAGC	/5Phos/GACAACTCTTCTTGTCTTGGAGCT
Odd_Bottom	Odd2Bo44	CGTTCATTACGTCAGT	/5Phos/GACAACTCGTTCATTACGTCAGTT
Odd_Bottom	Odd2Bo45	TGCTCTTCATAAGCCT	/5Phos/GACAACTTGCTCTTCATAAGCCTT
Odd_Bottom	Odd2Bo46	GGTCACCAAGAGACGC	/5Phos/GACAACTGGTCACCAAGAGACGCT
Odd_Bottom	Odd2Bo47	TTGTGTAGGAGCAAGT	/5Phos/GACAACTTTGTGTAGGAGCAAGTT
Odd_Bottom	Odd2Bo48	TCTCAATCTGGATCGC	/5Phos/GACAACTTCTCAATCTGGATCGCT
Odd_Bottom	Odd2Bo49	GCTGGAAGCCTCTAGC	/5Phos/GACAACTGCTGGAAGCCTCTAGCT
Odd_Bottom	Odd2Bo50	CGTTCTCCTTAGAGAT	/5Phos/GACAACTCGTTCTCCTTAGAGATT
Odd_Bottom	Odd2Bo51	CTCAAGGTGTCCGAGT	/5Phos/GACAACTCTCAAGGTGTCCGAGTT
Odd_Bottom	Odd2Bo52	ATATGAATATGTGGCT	/5Phos/GACAACTATATGAATATGTGGCTT
Odd_Bottom	Odd2Bo53	TGAATATAGGCACTTG	/5Phos/GACAACTTGAATATAGGCACTTGT
Odd_Bottom	Odd2Bo54	GCCTTCCGCCTCGTAT	/5Phos/GACAACTGCCTTCCGCCTCGTATT
Odd_Bottom	Odd2Bo55	ATTGCTTAACGGATTG	/5Phos/GACAACTATTGCTTAACGGATTGT
Odd_Bottom	Odd2Bo56	CTTCCAACACACGGAT	/5Phos/GACAACTCTTCCAACACACGGATT
Odd_Bottom	Odd2Bo57	TCGTGAGGATCAACGC	/5Phos/GACAACTTCGTGAGGATCAACGCT
Odd_Bottom	Odd2Bo58	ACGTTCCATGCTATCT	/5Phos/GACAACTACGTTCCATGCTATCTT
Odd_Bottom	Odd2Bo59	GTCTCTTGCATCACGC	/5Phos/GACAACTGTCTCTTGCATCACGCT
Odd_Bottom	Odd2Bo60	GTCACTCGGTGCGACT	/5Phos/GACAACTGTCACTCGGTGCGACTT
Odd_Bottom	Odd2Bo61	ATATCTGTGAGCCGAT	/5Phos/GACAACTATATCTGTGAGCCGATT
Odd_Bottom	Odd2Bo62	TAGACAGACGGTCTAT	/5Phos/GACAACTTAGACAGACGGTCTATT
Odd_Bottom	Odd2Bo63	GTATCGCACTCATTGT	/5Phos/GACAACTGTATCGCACTCATTGTT
Odd_Bottom	Odd2Bo64	CCTACATCTGTCGAGT	/5Phos/GACAACTCCTACATCTGTCGAGTT
Odd_Bottom	Odd2Bo65	TGATACCGTAGCAGAT	/5Phos/GACAACTTGATACCGTAGCAGATT
Odd_Bottom	Odd2Bo66	GGATAGCACCGTTCAT	/5Phos/GACAACTGGATAGCACCGTTCATT
Odd_Bottom	Odd2Bo67	ATGAGTGCCGCAGACT	/5Phos/GACAACTATGAGTGCCGCAGACTT
Odd_Bottom	Odd2Bo68	GCCTAGTAGAAGACGT	/5Phos/GACAACTGCCTAGTAGAAGACGTT
Odd_Bottom	Odd2Bo69	TAATTGAATACACCGT	/5Phos/GACAACTTAATTGAATACACCGTT
Odd_Bottom	Odd2Bo70	TGCCATTCCACTTAGC	/5Phos/GACAACTTGCCATTCCACTTAGCT
Odd_Bottom	Odd2Bo71	CCTCCAGTGTCGTCGC	/5Phos/GACAACTCCTCCAGTGTCGTCGCT
Odd_Bottom	Odd2Bo72	GGAGTGCGTGTTAGCT	/5Phos/GACAACTGGAGTGCGTGTTAGCTT
Odd_Bottom	Odd2Bo73	TTCTAACACACAGCCT	/5Phos/GACAACTTTCTAACACACAGCCTT
Odd_Bottom	Odd2Bo74	GACCAAGCACCAGACT	/5Phos/GACAACTGACCAAGCACCAGACTT
Odd_Bottom	Odd2Bo75	CCTATTGCATCTTCAT	/5Phos/GACAACTCCTATTGCATCTTCATT
Odd_Bottom	Odd2Bo76	GTGCTAACCTACACAT	/5Phos/GACAACTGTGCTAACCTACACATT
Odd_Bottom	Odd2Bo77	CATATCTCGAATAGGC	/5Phos/GACAACTCATATCTCGAATAGGCT
Odd_Bottom	Odd2Bo78	GACGAACTCCATGCGT	/5Phos/GACAACTGACGAACTCCATGCGTT
Odd_Bottom	Odd2Bo79	GTCCGATGGACGCCGT	/5Phos/GACAACTGTCCGATGGACGCCGTT
Odd_Bottom	Odd2Bo80	CAACGAGGTCAGTCGC	/5Phos/GACAACTCAACGAGGTCAGTCGCT
Odd_Bottom	Odd2Bo81	TAGTGGCACTTCACCT	/5Phos/GACAACTTAGTGGCACTTCACCTT
Odd_Bottom	Odd2Bo82	ACCTTCCTATGCTACT	/5Phos/GACAACTACCTTCCTATGCTACTT
Odd_Bottom	Odd2Bo83	ATCGAGGATAGCCTGT	/5Phos/GACAACTATCGAGGATAGCCTGTT
Odd_Bottom	Odd2Bo84	ACTCAGGAAGGCTGAT	/5Phos/GACAACTACTCAGGAAGGCTGATT
Odd_Bottom	Odd2Bo85	TGGCAACGGCTCATGT	/5Phos/GACAACTTGGCAACGGCTCATGTT
Odd_Bottom	Odd2Bo86	CGGCAAGACTGCCTAT	/5Phos/GACAACTCGGCAAGACTGCCTATT
Odd_Bottom	Odd2Bo87	TAACGCAGGATACTAT	/5Phos/GACAACTTAACGCAGGATACTATT
Odd_Bottom	Odd2Bo88	GCTCTTGGAGGTATCT	/5Phos/GACAACTGCTCTTGGAGGTATCTT
Odd_Bottom	Odd2Bo89	CGAAGTGGTTCGGTCT	/5Phos/GACAACTCGAAGTGGTTCGGTCTT
Odd_Bottom	Odd2Bo90	CTAACGCTGTGAAGGC	/5Phos/GACAACTCTAACGCTGTGAAGGCT
Odd_Bottom	Odd2Bo91	CTCCGAGATGATGTGT	/5Phos/GACAACTCTCCGAGATGATGTGTT
Odd_Bottom	Odd2Bo92	CGCTGACATAAGACCT	/5Phos/GACAACTCGCTGACATAAGACCTT
Odd_Bottom	Odd2Bo93	TGAGAGGATGAATGCT	/5Phos/GACAACTTGAGAGGATGAATGCTT
Odd_Bottom	Odd2Bo94	CAGACTCAATTAGGCT	/5Phos/GACAACTCAGACTCAATTAGGCTT
Odd_Bottom	Odd2Bo95	TCGTGTCATCGCTAGT	/5Phos/GACAACTTCGTGTCATCGCTAGTT
Odd_Bottom	Odd2Bo96	AGAAGCCTCGGATTGT	/5Phos/GACAACTAGAAGCCTCGGATTGTT
Odd_Top	Odd2Top1		/5Phos/CAAGTCAAGCTAGATTCCACGAAG
Odd_Top	Odd2Top2		/5Phos/CAAGTCAAAGATACTTCTGTAGGC
Odd_Top	Odd2Top3		/5Phos/CAAGTCAAGCCTATGAGTAATACC
Odd_Top	Odd2Top4		/5Phos/CAAGTCAAATAAGGTGGCTTGTCT
Odd_Top	Odd2Top5		/5Phos/CAAGTCAAATCCTTAGTTAGAGGC
Odd_Top	Odd2Top6		/5Phos/CAAGTCAAAGCGGTGCTTGACACC
Odd_Top	Odd2Top7		/5Phos/CAAGTCAACAATTATATTGCGGTG
Odd_Top	Odd2Top8		/5Phos/CAAGTCAAAGGTGACAGACACAGC
Odd_Top	Odd2Top9		/5Phos/CAAGTCAAACTCTAACGCACAGGA
Odd_Top	Odd2Top10		/5Phos/CAAGTCAAATGGTCTGTTGCCGAC
Odd_Top	Odd2Top11		/5Phos/CAAGTCAAGCTCAGGCGTGACCGC
Odd_Top	Odd2Top12		/5Phos/CAAGTCAAAGTTAGAGGCACGGCG
Odd_Top	Odd2Top13		/5Phos/CAAGTCAAACCGCTGCGATTGATA
Odd_Top	Odd2Top14		/5Phos/CAAGTCAAAGGCATTCGACCTAGT
Odd_Top	Odd2Top15		/5Phos/CAAGTCAAGCCTCGTTCATTGATT
Odd_Top	Odd2Top16		/5Phos/CAAGTCAACACACAACCTAGCCAA
Odd_Top	Odd2Top17		/5Phos/CAAGTCAAACGGACACCTCTAGTG
Odd_Top	Odd2Top18		/5Phos/CAAGTCAAACAAGATTATAGCACG
Odd_Top	Odd2Top19		/5Phos/CAAGTCAAAATTGCTCCACTCGAA
Odd_Top	Odd2Top20		/5Phos/CAAGTCAAACAATGCAAGCAACCA
Odd_Top	Odd2Top21		/5Phos/CAAGTCAAGCGTAACTGCATGGCG
Odd_Top	Odd2Top22		/5Phos/CAAGTCAAACACGGTGACGAACTA
Odd_Top	Odd2Top23		/5Phos/CAAGTCAAAGAGTCCGATGACGCT
Odd_Top	Odd2Top24		/5Phos/CAAGTCAAACGCCTAACGAACCGA
Odd_Top	Odd2Top25		/5Phos/CAAGTCAAAGGACTAACCGAGTAT
Odd_Top	Odd2Top26		/5Phos/CAAGTCAAAACCTAGCGTTCTACT
Odd_Top	Odd2Top27		/5Phos/CAAGTCAAAGCCTCACTAGGCGGA
Odd_Top	Odd2Top28		/5Phos/CAAGTCAACAATAGGACGTTGCTG
Odd_Top	Odd2Top29		/5Phos/CAAGTCAAGCTACGTCGTAGGCAC
Odd_Top	Odd2Top30		/5Phos/CAAGTCAAAGTTCAACGTGTGACG
Odd_Top	Odd2Top31		/5Phos/CAAGTCAAATCTCACTGCGTCCTT
Odd_Top	Odd2Top32		/5Phos/CAAGTCAAAAGTAGGTGCCGTATA
Odd_Top	Odd2Top33		/5Phos/CAAGTCAAACAGAATGAGAACGAT
Odd_Top	Odd2Top34		/5Phos/CAAGTCAAGCGGCGTGGTATGATG
Odd_Top	Odd2Top35		/5Phos/CAAGTCAAAGCCTTATCACATCAT
Odd_Top	Odd2Top36		/5Phos/CAAGTCAAGCGGAGGCTGCAACCA
Odd_Top	Odd2Top37		/5Phos/CAAGTCAAATACACGGTGATTGTA
Odd_Top	Odd2Top38		/5Phos/CAAGTCAAATGGCACCAGAGTATG
Odd_Top	Odd2Top39		/5Phos/CAAGTCAAAACGGAAGTGTTCAAC
Odd_Top	Odd2Top40		/5Phos/CAAGTCAAATCGCTCGACGTGTGA
Odd_Top	Odd2Top41		/5Phos/CAAGTCAAAGTCCTTATCGGCGTT
Odd_Top	Odd2Top42		/5Phos/CAAGTCAAGCTCACTGTCCAGGAT
Odd_Top	Odd2Top43		/5Phos/CAAGTCAAGCTCCAAGACAAGAAG
Odd_Top	Odd2Top44		/5Phos/CAAGTCAAACTGACGTAATGAACG
Odd_Top	Odd2Top45		/5Phos/CAAGTCAAAGGCTTATGAAGAGCA
Odd_Top	Odd2Top46		/5Phos/CAAGTCAAGCGTCTCTTGGTGACC
Odd_Top	Odd2Top47		/5Phos/CAAGTCAAACTTGCTCCTACACAA
Odd_Top	Odd2Top48		/5Phos/CAAGTCAAGCGATCCAGATTGAGA
Odd_Top	Odd2Top49		/5Phos/CAAGTCAAGCTAGAGGCTTCCAGC
Odd_Top	Odd2Top50		/5Phos/CAAGTCAAATCTCTAAGGAGAACG
Odd_Top	Odd2Top51		/5Phos/CAAGTCAAACTCGGACACCTTGAG
Odd_Top	Odd2Top52		/5Phos/CAAGTCAAAGCCACATATTCATAT
Odd_Top	Odd2Top53		/5Phos/CAAGTCAACAAGTGCCTATATTCA
Odd_Top	Odd2Top54		/5Phos/CAAGTCAAATACGAGGCGGAAGGC
Odd_Top	Odd2Top55		/5Phos/CAAGTCAACAATCCGTTAAGCAAT
Odd_Top	Odd2Top56		/5Phos/CAAGTCAAATCCGTGTGTTGGAAG
Odd_Top	Odd2Top57		/5Phos/CAAGTCAAGCGTTGATCCTCACGA
Odd_Top	Odd2Top58		/5Phos/CAAGTCAAAGATAGCATGGAACGT
Odd_Top	Odd2Top59		/5Phos/CAAGTCAAGCGTGATGCAAGAGAC
Odd_Top	Odd2Top60		/5Phos/CAAGTCAAAGTCGCACCGAGTGAC
Odd_Top	Odd2Top61		/5Phos/CAAGTCAAATCGGCTCACAGATAT
Odd_Top	Odd2Top62		/5Phos/CAAGTCAAATAGACCGTCTGTCTA
Odd_Top	Odd2Top63		/5Phos/CAAGTCAAACAATGAGTGCGATAC
Odd_Top	Odd2Top64		/5Phos/CAAGTCAAACTCGACAGATGTAGG
Odd_Top	Odd2Top65		/5Phos/CAAGTCAAATCTGCTACGGTATCA
Odd_Top	Odd2Top66		/5Phos/CAAGTCAAATGAACGGTGCTATCC
Odd_Top	Odd2Top67		/5Phos/CAAGTCAAAGTCTGCGGCACTCAT
Odd_Top	Odd2Top68		/5Phos/CAAGTCAAACGTCTTCTACTAGGC
Odd_Top	Odd2Top69		/5Phos/CAAGTCAAACGGTGTATTCAATTA
Odd_Top	Odd2Top70		/5Phos/CAAGTCAAGCTAAGTGGAATGGCA
Odd_Top	Odd2Top71		/5Phos/CAAGTCAAGCGACGACACTGGAGG
Odd_Top	Odd2Top72		/5Phos/CAAGTCAAAGCTAACACGCACTCC
Odd_Top	Odd2Top73		/5Phos/CAAGTCAAAGGCTGTGTGTTAGAA
Odd_Top	Odd2Top74		/5Phos/CAAGTCAAAGTCTGGTGCTTGGTC
Odd_Top	Odd2Top75		/5Phos/CAAGTCAAATGAAGATGCAATAGG
Odd_Top	Odd2Top76		/5Phos/CAAGTCAAATGTGTAGGTTAGCAC
Odd_Top	Odd2Top77		/5Phos/CAAGTCAAGCCTATTCGAGATATG
Odd_Top	Odd2Top78		/5Phos/CAAGTCAAACGCATGGAGTTCGTC
Odd_Top	Odd2Top79		/5Phos/CAAGTCAAACGGCGTCCATCGGAC
Odd_Top	Odd2Top80		/5Phos/CAAGTCAAGCGACTGACCTCGTTG
Odd_Top	Odd2Top81		/5Phos/CAAGTCAAAGGTGAAGTGCCACTA
Odd_Top	Odd2Top82		/5Phos/CAAGTCAAAGTAGCATAGGAAGGT
Odd_Top	Odd2Top83		/5Phos/CAAGTCAAACAGGCTATCCTCGAT
Odd_Top	Odd2Top84		/5Phos/CAAGTCAAATCAGCCTTCCTGAGT
Odd_Top	Odd2Top85		/5Phos/CAAGTCAAACATGAGCCGTTGCCA
Odd_Top	Odd2Top86		/5Phos/CAAGTCAAATAGGCAGTCTTGCCG
Odd_Top	Odd2Top87		/5Phos/CAAGTCAAATAGTATCCTGCGTTA
Odd_Top	Odd2Top88		/5Phos/CAAGTCAAAGATACCTCCAAGAGC
Odd_Top	Odd2Top89		/5Phos/CAAGTCAAAGACCGAACCACTTCG
Odd_Top	Odd2Top90		/5Phos/CAAGTCAAGCCTTCACAGCGTTAG
Odd_Top	Odd2Top91		/5Phos/CAAGTCAAACACATCATCTCGGAG
Odd_Top	Odd2Top92		/5Phos/CAAGTCAAAGGTCTTATGTCAGCG
Odd_Top	Odd2Top93		/5Phos/CAAGTCAAAGCATTCATCCTCTCA
Odd_Top	Odd2Top94		/5Phos/CAAGTCAAAGCCTAATTGAGTCTG
Odd_Top	Odd2Top95		/5Phos/CAAGTCAAACTAGCGATGACACGA
Odd_Top	Odd2Top96		/5Phos/CAAGTCAAACAATCCGAGGCTTCT
